# Supplementary material for: Transient inflammatory response mediated by interleukin-1β is required for proper regeneration in zebrafish fin fold
Source: eLife. 2017 Feb 23;6:e22716. doi: 10.7554/eLife.22716 (PMC5360449; doi:10.7554/eLife.22716)
Supplement: Supplementary file 1. — The table of upregulated genes shows the list of transcripts whose final RPKMs of the amputated clo mutant at 6 hpa are more than two times than those of the amputated WT. The table of downregulated genes shows the list of top 100 transcripts whose final RPKMs of the amputated clo mutant at 6 hpa are downregulated compared with those of amputated WT. Transcripts with low expression in the clo mutant (final RPKM <4) were excluded. Final RPKM, the reads per kilobase of exon model per million mapped reads. Transcripts that are shown in Figure 1A are highlighted. DOI: http://dx.doi.org/10.7554/eLife.22716.019 [file elife-22716-supp1.xlsx]

## Sheet: Upregulated genes
Supplementary File 1. The list of transcripts that are upregulated or downregulated in the amputated fin fold of the clo mutant.
Gene Symbol	Descriptions	Entrez GeneID (including FAR)	Gene Length (kb)	final RPKM WT uncut	final RPKM WT cut	final RPKM clo cut	clo 6hpa final RPKM/WT 6hpa final RPKM	Link to UCSC	GeneID Link to NCBI	RNA accession Link to NCBI	Chromosome	Start	End	Orientation	Biological Process (GOID)	Biological Process (GOTerm)	Cellular Component (GOID)	Cellular Component (GOTerm)	Molecular Function (GOID)	Molecular Function (GOTerm)	KEGG Pathway
fads2	fatty acid desaturase 2	140615	1.666	0.57	0.59	26.25	44.4915	chr25:4189905-4205135	140615	NM_131645	chr25	4189905	4205135	-	GO:0006629 // GO:0006633 // GO:0006810 // GO:0008610 // GO:0022900 // GO:0055114	lipid metabolic process // fatty acid biosynthetic process // transport // lipid biosynthetic process // electron transport chain // oxidation-reduction process	GO:0005783 // GO:0005789 // GO:0016020 // GO:0016021	endoplasmic reticulum // endoplasmic reticulum membrane // membrane // integral to membrane	GO:0005506 // GO:0016491 // GO:0016717 // GO:0020037	iron ion binding // oxidoreductase activity // oxidoreductase activity, acting on paired donors, with oxidation of a pair of donors resulting in the reduction of molecular oxygen to two molecules of water // heme binding
LOC796384	novel protein similar to vertebrate 3-hydroxy-3-methylglutaryl-Coenzyme A reductase (HMGCR)	796384	3.011	2.05	1.24	49.76	40.129	chr5:52659865-52678919	796384	NM_001126459	chr5	52659865	52678919	-
scd	stearoyl-CoA desaturase (delta-9-desaturase)	386661	1.237	0.19	0.12	4.8	40	chr12:49689095-49697651	386661	NM_198815	chr12	49689095	49697651	+	GO:0006629 // GO:0006633 // GO:0008610 // GO:0055114	lipid metabolic process // fatty acid biosynthetic process // lipid biosynthetic process // oxidation-reduction process	GO:0005783 // GO:0016020 // GO:0016021	endoplasmic reticulum // membrane // integral to membrane	GO:0004768 // GO:0005506 // GO:0016491 // GO:0016717	stearoyl-CoA 9-desaturase activity // iron ion binding // oxidoreductase activity // oxidoreductase activity, acting on paired donors, with oxidation of a pair of donors resulting in the reduction of molecular oxygen to two molecules of water
hmgcra	3-hydroxy-3-methylglutaryl-Coenzyme A reductase a	559054	3.895	2.77	1.73	66.58	38.4855	chr5:52658957-52678922	559054	NM_001079977	chr5	52658957	52678922	-	GO:0007517 // GO:0008299 // GO:0015936 // GO:0055114	muscle organ development // isoprenoid biosynthetic process // coenzyme A metabolic process // oxidation-reduction process	GO:0005789 // GO:0016021	endoplasmic reticulum membrane // integral to membrane	GO:0004420 // GO:0016491 // GO:0016616 // GO:0050661 // GO:0050662	hydroxymethylglutaryl-CoA reductase (NADPH) activity // oxidoreductase activity // oxidoreductase activity, acting on the CH-OH group of donors, NAD or NADP as acceptor // NADP binding // coenzyme binding
sc4mol	sterol-C4-methyl oxidase-like	406662	4.183	12.07	6.63	232.07	35.003	chr1:19697855-19710041	406662	NM_213353	chr1	19697855	19710041	-	GO:0006633 // GO:0006694 // GO:0008610 // GO:0016126 // GO:0055114	fatty acid biosynthetic process // steroid biosynthetic process // lipid biosynthetic process // sterol biosynthetic process // oxidation-reduction process	GO:0005783 // GO:0005789 // GO:0016020 // GO:0016021	endoplasmic reticulum // endoplasmic reticulum membrane // membrane // integral to membrane	GO:0000254 // GO:0005506 // GO:0016491	C-4 methylsterol oxidase activity // iron ion binding // oxidoreductase activity
cyp51	cytochrome P450, family 51	414331	2.429	20.54	10.29	301.88	29.3372	chr19:577361-595879	414331	NM_001001730	chr19	577361	595879	-	GO:0032259 // GO:0055114	methylation // oxidation-reduction process			GO:0004497 // GO:0005506 // GO:0008168 // GO:0009055 // GO:0016705 // GO:0020037 // GO:0046872	monooxygenase activity // iron ion binding // methyltransferase activity // electron carrier activity // oxidoreductase activity, acting on paired donors, with incorporation or reduction of molecular oxygen // heme binding // metal ion binding
isg15	ISG15 ubiquitin-like modifier	558956	1.143	0.14	0.26	7.36	28.3077	chr5:21895360-21896614	558956	NM_001204169	chr5	21895360	21896614	+
tm7sf2	transmembrane 7 superfamily member 2	494054	3.318	7.04	2.26	59.81	26.4646	chr10:27608357-27613869	494054	NM_001008597	chr10	27608357	27613869	+	GO:0055114	oxidation-reduction process	GO:0016020	membrane	GO:0016628	oxidoreductase activity, acting on the CH-CH group of donors, NAD or NADP as acceptor
lss	lanosterol synthase (2,3-oxidosqualene-lanosterol cyclase)	795400	5.459	3.07	1.48	35.19	23.777	chr9:39534166-39552700	795400	NM_001083567	chr9	39534166	39552700	+					GO:0003824 // GO:0016866	catalytic activity // intramolecular transferase activity
il1b	interleukin 1, beta	405770	1.747	0.44	1.18	25.99	22.0254	chr10:46394748-46400871	405770	NM_212844	chr10	46394748	46400871	-	GO:0006954 // GO:0006955 // GO:0006955 // GO:0009617 // GO:0032496 // GO:0042742 // GO:0046685	inflammatory response // immune response // immune response // response to bacterium // response to lipopolysaccharide // defense response to bacterium // response to arsenic-containing substance	GO:0005576 // GO:0005615	extracellular region // extracellular space	GO:0005125 // GO:0005149	cytokine activity // interleukin-1 receptor binding
zgc:171801	zgc:171801	799528	5.203	7.73	3.16	57.69	18.2563	chr16:46192801-46205093	799528	NM_001110039	chr16	46192801	46205093	-	GO:0006631 // GO:0008152 // GO:0055114	fatty acid metabolic process // metabolic process // oxidation-reduction process	GO:0016021	integral to membrane	GO:0003857 // GO:0004506 // GO:0016491 // GO:0050660	3-hydroxyacyl-CoA dehydrogenase activity // squalene monooxygenase activity // oxidoreductase activity // flavin adenine dinucleotide binding
ebp	emopamil binding protein (sterol isomerase)	436600	1.365	8.71	3.78	68.72	18.1799	chr23:19436610-19441822	436600	NM_001002328	chr23	19436610	19441822	-	GO:0016125	sterol metabolic process	GO:0005783 // GO:0016021	endoplasmic reticulum // integral to membrane	GO:0047750	cholestenol delta-isomerase activity
dhcr24	24-dehydrocholesterol reductase	494102	3.372	3.39	1.63	25.2	15.4601	chr20:7323828-7351538	494102	NM_001008645	chr20	7323828	7351538	-	GO:0055114	oxidation-reduction process			GO:0003824 // GO:0008762 // GO:0016491 // GO:0016614 // GO:0050660	catalytic activity // UDP-N-acetylmuramate dehydrogenase activity // oxidoreductase activity // oxidoreductase activity, acting on CH-OH group of donors // flavin adenine dinucleotide binding
zgc:152911	zgc:152911	572245	4.106	1.81	1.64	25.26	15.4024	chr3:62823449-62830555	572245	NM_001077584	chr3	62823449	62830555	+	GO:0007154	cell communication	GO:0005575	cellular_component	GO:0035091	phosphatidylinositol binding
zgc:100824	zgc:100824	492781	1.176	6.98	3.6	53.83	14.9528	chr11:11190352-11201629	492781	NM_001007422	chr11	11190352	11201629	-	GO:0006694 // GO:0006695 // GO:0008299 // GO:0008610 // GO:0016126 // GO:0016310	steroid biosynthetic process // cholesterol biosynthetic process // isoprenoid biosynthetic process // lipid biosynthetic process // sterol biosynthetic process // phosphorylation	GO:0005575	cellular_component	GO:0000166 // GO:0004163 // GO:0005524 // GO:0016301 // GO:0016829	nucleotide binding // diphosphomevalonate decarboxylase activity // ATP binding // kinase activity // lyase activity
insig1	insulin induced gene 1	334189	7.141	10.74	5.48	75.41	13.7609	chr7:43738992-43744365	334189	NM_199869	chr7	43738992	43744365	-	GO:0006629 // GO:0008202 // GO:0008203	lipid metabolic process // steroid metabolic process // cholesterol metabolic process	GO:0005783 // GO:0005789 // GO:0016020 // GO:0016021	endoplasmic reticulum // endoplasmic reticulum membrane // membrane // integral to membrane
dhcr7	7-dehydrocholesterol reductase	378446	2.705	5.93	3.2	43.09	13.4656	chr2:27968539-27989075	378446	NM_201330	chr2	27968539	27989075	-	GO:0006694 // GO:0006695 // GO:0008610 // GO:0016126 // GO:0055114	steroid biosynthetic process // cholesterol biosynthetic process // lipid biosynthetic process // sterol biosynthetic process // oxidation-reduction process	GO:0005783 // GO:0005789 // GO:0016020 // GO:0016021	endoplasmic reticulum // endoplasmic reticulum membrane // membrane // integral to membrane	GO:0016491 // GO:0016628 // GO:0047598	oxidoreductase activity // oxidoreductase activity, acting on the CH-CH group of donors, NAD or NADP as acceptor // 7-dehydrocholesterol reductase activity
adm2	adrenomedullin 2	403114	4.571	1.05	0.49	6.51	13.2857	chr4:8942883-8954065	403114	NM_001130135	chr4	8942883	8954065	-			GO:0005576	extracellular region	GO:0005179	hormone activity
fdps	farnesyl diphosphate synthase (farnesyl pyrophosphate synthetase, dimethylallyltranstransferase, geranyltranstransferase)	552997	5.485	27.86	18.97	227.21	11.9773	chr16:15775161-15787891	552997	NM_001025471	chr16	15775161	15787891	+	GO:0008299	isoprenoid biosynthetic process			GO:0016740	transferase activity
aacs	acetoacetyl-CoA synthetase	393984	7.434	3.55	3.38	38.44	11.3728	chr5:20611070-20681231	393984	NM_201009	chr5	20611070	20681231	-	GO:0006629 // GO:0006631 // GO:0008152	lipid metabolic process // fatty acid metabolic process // metabolic process	GO:0005737 // GO:0005829	cytoplasm // cytosol	GO:0000166 // GO:0003824 // GO:0005524 // GO:0016874 // GO:0030729	nucleotide binding // catalytic activity // ATP binding // ligase activity // acetoacetate-CoA ligase activity
si:ch73-107c13.2	si:ch73-107c13.2	571911	1.392	4.47	3.25	36.9	11.3538	chr20:53541588-53573520	571911	NM_001202525	chr20	53541588	53573520	-	GO:0008610 // GO:0009058	lipid biosynthetic process // biosynthetic process	GO:0016021	integral to membrane	GO:0004310 // GO:0016740 // GO:0016765	farnesyl-diphosphate farnesyltransferase activity // transferase activity // transferase activity, transferring alkyl or aryl (other than methyl) groups
sc5dl	sterol-C5-desaturase (ERG3 delta-5-desaturase homolog, S. cerevisiae)-like	447891	5.965	5.27	3.1	34.78	11.2194	chr21:23809400-23813162	447891	NM_001004630	chr21	23809400	23813162	-	GO:0006633 // GO:0055114	fatty acid biosynthetic process // oxidation-reduction process	GO:0016020 // GO:0016021	membrane // integral to membrane	GO:0005506 // GO:0016491	iron ion binding // oxidoreductase activity
si:ch211-107o23.1	si:ch211-107o23.1	571470	3.759	0.27	0.7	7.31	10.4429	chr18:27022220-27029974	571470	NM_001045219	chr18	27022220	27029974	+
hmgcs1	3-hydroxy-3-methylglutaryl-Coenzyme A synthase 1 (soluble)	394060	5.421	21.14	13.32	134.73	10.1149	chr10:7998705-8020026	394060	NM_201085	chr10	7998705	8020026	+	GO:0008152 // GO:0008299	metabolic process // isoprenoid biosynthetic process	GO:0005575	cellular_component	GO:0003824 // GO:0004421	catalytic activity // hydroxymethylglutaryl-CoA synthase activity
hsd17b7	hydroxysteroid (17-beta) dehydrogenase 7	768185	1.74	3.36	2.58	25.48	9.87597	chr6:34866682-34881559	768185	NM_001077328	chr6	34866682	34881559	+	GO:0008152	metabolic process	GO:0005575	cellular_component	GO:0000166 // GO:0016491	nucleotide binding // oxidoreductase activity
si:dkey-53p21.1	si:dkey-53p21.1	550429	1.802	0.54	0.52	5.12	9.84615	chr16:29965245-29977398	550429	NM_001017734	chr16	29965245	29977398	-	GO:0055114	oxidation-reduction process	GO:0016021	integral to membrane	GO:0000166 // GO:0005506 // GO:0009055 // GO:0016491 // GO:0050660	nucleotide binding // iron ion binding // electron carrier activity // oxidoreductase activity // flavin adenine dinucleotide binding
si:ch73-6k14.1	si:ch73-6k14.1	795785	0.565	3.48	6.7	61.08	9.11642	chr1:49728968-49732158	795785	NM_001115060	chr1	49728968	49732158	-	GO:0006955	immune response	GO:0005576 // GO:0005615	extracellular region // extracellular space	GO:0005125 // GO:0008009	cytokine activity // chemokine activity
pmt	phosphoethanolamine methyltransferase	767699	2.222	5.08	3.1	27.97	9.02258	Zv9_NA47:37119-47147	767699	NM_001076637	Zv9_NA47	37119	47147	-	GO:0008152	metabolic process	GO:0005575	cellular_component	GO:0008168	methyltransferase activity
elovl2	elongation of very long chain fatty acids (FEN1/Elo2, SUR4/Elo3, yeast)-like 2	678614	2.053	1.22	1.28	11.37	8.88281	chr24:8664121-8688060	678614	NM_001040362	chr24	8664121	8688060	-	GO:0042761	very long-chain fatty acid biosynthetic process	GO:0016021	integral to membrane	GO:0003674	molecular_function
cyb5r2	cytochrome b5 reductase 2	751641	4.751	2.33	1.75	15.53	8.87429	chr25:16403671-16414596	751641	NM_001045360	chr25	16403671	16414596	-	GO:0006694 // GO:0008610 // GO:0016126 // GO:0055114	steroid biosynthetic process // lipid biosynthetic process // sterol biosynthetic process // oxidation-reduction process	GO:0016020 // GO:0016021	membrane // integral to membrane	GO:0004128 // GO:0016491	cytochrome-b5 reductase activity // oxidoreductase activity
s100z	S100 calcium binding protein Z	554089	1.113	0.49	0.48	4.25	8.85417	chr21:7136708-7156370	554089	NM_001024391	chr21	7136708	7156370	-			GO:0005575	cellular_component	GO:0005509	calcium ion binding
nsdhl	NAD(P) dependent steroid dehydrogenase-like	550369	3.04	5.83	4.24	34.37	8.10613	chr14:18546702-18559067	550369	NM_001017674	chr14	18546702	18559067	-	GO:0006694 // GO:0055114	steroid biosynthetic process // oxidation-reduction process			GO:0000166 // GO:0003854 // GO:0016491 // GO:0016616	nucleotide binding // 3-beta-hydroxy-delta5-steroid dehydrogenase activity // oxidoreductase activity // oxidoreductase activity, acting on the CH-OH group of donors, NAD or NADP as acceptor
rdh12	retinol dehydrogenase 12 (all-trans and 9-cis)	436597	4.108	2.88	2.34	16.86	7.20513	chr13:33279224-33289445	436597	NM_001002325	chr13	33279224	33289445	+	GO:0008152 // GO:0055114	metabolic process // oxidation-reduction process			GO:0000166 // GO:0016491	nucleotide binding // oxidoreductase activity
si:dkey-127j5.5	si:dkey-127j5.5	566223	5.966	2.42	2.08	14.76	7.09615	chr5:32053267-32057653	566223	NM_001128731	chr5	32053267	32057653	-	GO:0006355	regulation of transcription, DNA-dependent	GO:0005634	nucleus	GO:0003677 // GO:0003700 // GO:0043565 // GO:0046983	DNA binding // sequence-specific DNA binding transcription factor activity // sequence-specific DNA binding // protein dimerization activity
ldlr	low density lipoprotein receptor	387529	5.179	0.72	1.25	8.87	7.096	chr3:19121207-19143302	387529	NM_001030283	chr3	19121207	19143302	+			GO:0016020 // GO:0016021	membrane // integral to membrane	GO:0004872 // GO:0005509	receptor activity // calcium ion binding
irf7	interferon regulatory factor 7	393650	8.929	1.36	1.41	9.82	6.96454	chr25:26412235-26416361	393650	NM_200677	chr25	26412235	26416361	-	GO:0006355	regulation of transcription, DNA-dependent			GO:0000975 // GO:0003700	regulatory region DNA binding // sequence-specific DNA binding transcription factor activity
idi1	isopentenyl-diphosphate delta isomerase 1	553513	3.474	32.05	23.29	161.84	6.94891	chr24:3547093-3554813	553513	NM_001025475	chr24	3547093	3554813	-	GO:0008299	isoprenoid biosynthetic process	GO:0005575	cellular_component	GO:0004452 // GO:0016787	isopentenyl-diphosphate delta-isomerase activity // hydrolase activity
hsd17b7	hydroxysteroid (17-beta) dehydrogenase 7	768185	1.739	3.39	2.2	14.82	6.73636	chr6:34798397-34813320	768185	NM_001077328	chr6	34798397	34813320	+	GO:0008152	metabolic process	GO:0005575	cellular_component	GO:0000166 // GO:0016491	nucleotide binding // oxidoreductase activity
zgc:194659	zgc:194659	100007373	3.389	1.27	0.97	6.52	6.72165	chr3:1198005-1200788	100007373	NR_024238	chr3	1198005	1200788	+	GO:0008150	biological_process	GO:0005575	cellular_component	GO:0005525	GTP binding
mmp13a	matrix metalloproteinase 13a	387293	3.327	3.16	17.43	116.23	6.66839	chr10:39959950-39979811	387293	NM_201503	chr10	39959950	39979811	+	GO:0006508 // GO:0008152 // GO:0009790 // GO:0048246	proteolysis // metabolic process // embryo development // macrophage chemotaxis	GO:0031012	extracellular matrix	GO:0004222 // GO:0005509 // GO:0008233 // GO:0008237 // GO:0008270 // GO:0016787 // GO:0046872	metalloendopeptidase activity // calcium ion binding // peptidase activity // metallopeptidase activity // zinc ion binding // hydrolase activity // metal ion binding
zgc:110847	zgc:110847	791612	3.725	3.95	2.03	13.26	6.53202	chr5:72058488-72072287	791612	NM_001014296	chr5	72058488	72072287	-	GO:0006556 // GO:0006730	S-adenosylmethionine biosynthetic process // one-carbon metabolic process	GO:0005575	cellular_component	GO:0000166 // GO:0004478 // GO:0005524 // GO:0016740 // GO:0046872	nucleotide binding // methionine adenosyltransferase activity // ATP binding // transferase activity // metal ion binding
arg2	arginase, type II	322614	2.902	0.77	1.25	8.1	6.48	chr13:33248149-33257863	322614	NM_199611	chr13	33248149	33257863	+	GO:0006525	arginine metabolic process			GO:0004053 // GO:0016787 // GO:0016813 // GO:0046872	arginase activity // hydrolase activity // hydrolase activity, acting on carbon-nitrogen (but not peptide) bonds, in linear amidines // metal ion binding
tnfb	tumor necrosis factor b (TNF superfamily, member 2)	554167	3.493	0.29	0.62	4.01	6.46774	chr15:33995848-33998901	554167	NM_001024447	chr15	33995848	33998901	+	GO:0006955	immune response	GO:0005615 // GO:0016020	extracellular space // membrane	GO:0005125 // GO:0005164	cytokine activity // tumor necrosis factor receptor binding
ap1m2	adaptor-related protein complex 1, mu 2 subunit	403021	3.356	6.65	4.72	29.72	6.29661	chr6:47584-54749	403021	NM_205714	chr6	47584	54749	+	GO:0006810 // GO:0006886 // GO:0006892 // GO:0009887 // GO:0016192	transport // intracellular protein transport // post-Golgi vesicle-mediated transport // organ morphogenesis // vesicle-mediated transport	GO:0030131	clathrin adaptor complex
pth1a	parathyroid hormone 1a	405886	0.675	1.43	0.86	5.34	6.2093	chr25:18348089-18348986	405886	NM_212950	chr25	18348089	18348986	+			GO:0005576 // GO:0005576	extracellular region // extracellular region	GO:0005179 // GO:0005179	hormone activity // hormone activity
tfe3a	transcription factor binding to IGHM enhancer 3a	114834	2.189	1.19	0.95	5.84	6.14737	chr8:8319046-8349721	114834	NM_131848	chr8	8319046	8349721	-	GO:0006351 // GO:0006355	transcription, DNA-dependent // regulation of transcription, DNA-dependent	GO:0005654	nucleoplasm	GO:0001071 // GO:0046983	nucleic acid binding transcription factor activity // protein dimerization activity
srebf1	sterol regulatory element binding transcription factor 1	793274	5.48	3.55	2.43	14.27	5.87243	chr3:62721993-62749004	793274	NM_001105129	chr3	62721993	62749004	-
pmt	phosphoethanolamine methyltransferase	767699	1.152	2.41	1.9	11.1	5.84211	Zv9_NA584:182-7817	767699	NM_001076637	Zv9_NA584	182	7817	-	GO:0008152	metabolic process	GO:0005575	cellular_component	GO:0008168	methyltransferase activity
cyp3c1l2	cytochrome P450, family 3, subfamily c, polypeptide 1 like, 2	492759	2.502	0.5	0.7	4.03	5.75714	chr3:40942743-40950564	492759	NM_001007400	chr3	40942743	40950564	-	GO:0055114	oxidation-reduction process			GO:0004497 // GO:0005506 // GO:0009055 // GO:0016491 // GO:0016705 // GO:0020037 // GO:0046872	monooxygenase activity // iron ion binding // electron carrier activity // oxidoreductase activity // oxidoreductase activity, acting on paired donors, with incorporation or reduction of molecular oxygen // heme binding // metal ion binding
zgc:63759	zgc:63759	393460	1.475	4.42	2.21	12.7	5.74661	Zv9_NA996:15149-16832	393460	NM_200488	Zv9_NA996	15149	16832	+	GO:0008150	biological_process			GO:0003674	molecular_function
ush1c	Usher syndrome 1C (autosomal recessive, severe)	564412	5.649	0.23	1.17	6.68	5.7094	chr25:23367293-23427572	564412	NM_001039929	chr25	23367293	23427572	+	GO:0008150	biological_process	GO:0005575	cellular_component
igfbp1a	insulin-like growth factor binding protein 1a	317638	2.508	7.91	17.64	99.23	5.62528	chr20:7029615-7033442	317638	NM_173283	chr20	7029615	7033442	+	GO:0001558 // GO:0001666 // GO:0008285	regulation of cell growth // response to hypoxia // negative regulation of cell proliferation	GO:0005576	extracellular region	GO:0005520 // GO:0031994 // GO:0031995	insulin-like growth factor binding // insulin-like growth factor I binding // insulin-like growth factor II binding
mid1ip1b	MID1 interacting protein 1b	393805	2.194	15.65	11.08	60	5.41516	chr22:11547555-11548650	393805	NM_200832	chr22	11547555	11548650	-	GO:0008150	biological_process	GO:0005634 // GO:0005737 // GO:0005856 // GO:0005874	nucleus // cytoplasm // cytoskeleton // microtubule	GO:0003674	molecular_function
zgc:63759	zgc:63759	393460	1.412	12.47	5.93	32.03	5.40135	chr6:38251-45111	393460	NM_200488	chr6	38251	45111	+	GO:0008150	biological_process			GO:0003674	molecular_function
hamp2	hepcidin antimicrobial peptide 2	594858	0.644	0.23	0.76	4.06	5.34211	chr16:53816350-53818986	594858	NM_001023579	chr16	53816350	53818986	+	GO:0006879 // GO:0042742	cellular iron ion homeostasis // defense response to bacterium	GO:0005576	extracellular region	GO:0005179	hormone activity
mmp9	matrix metalloproteinase 9	406397	7.15	9.93	35.08	183.74	5.23774	chr8:25134468-25148890	406397	NM_213123	chr8	25134468	25148890	+	GO:0002633 // GO:0006508 // GO:0008152 // GO:0009617	positive regulation of granuloma formation // proteolysis // metabolic process // response to bacterium	GO:0031012	extracellular matrix	GO:0004222 // GO:0008233 // GO:0008237 // GO:0008270 // GO:0016787 // GO:0046872	metalloendopeptidase activity // peptidase activity // metallopeptidase activity // zinc ion binding // hydrolase activity // metal ion binding
mknk2b	MAP kinase-interacting serine/threonine kinase 2b	373121	11.274	12.92	14.26	72.25	5.06662	chr8:20976907-20987559	373121	NM_194402	chr8	20976907	20987559	+	GO:0006468 // GO:0016310	protein phosphorylation // phosphorylation			GO:0000166 // GO:0004672 // GO:0004674 // GO:0005524 // GO:0016301 // GO:0016772	nucleotide binding // protein kinase activity // protein serine/threonine kinase activity // ATP binding // kinase activity // transferase activity, transferring phosphorus-containing groups
lipg	lipase, endothelial	393096	3.055	27.21	17.16	84.52	4.92541	chr8:33224978-33234047	393096	NM_200128	chr8	33224978	33234047	-	GO:0006629	lipid metabolic process			GO:0003824 // GO:0004465 // GO:0016787	catalytic activity // lipoprotein lipase activity // hydrolase activity
acat2	acetyl-CoA acetyltransferase 2	30643	3.087	9.81	7.47	35.39	4.73762	chr20:30948503-30957047	30643	NM_131370	chr20	30948503	30957047	-	GO:0008152	metabolic process			GO:0003824 // GO:0016740 // GO:0016747	catalytic activity // transferase activity // transferase activity, transferring acyl groups other than amino-acyl groups
srebf2	sterol regulatory element binding transcription factor 2	100037309	14.49	16.06	12.19	57.09	4.68335	chr3:1880241-1904031	100037309	NM_001089466	chr3	1880241	1904031	+	GO:0006351 // GO:0006355 // GO:0006629 // GO:0008202 // GO:0008203	transcription, DNA-dependent // regulation of transcription, DNA-dependent // lipid metabolic process // steroid metabolic process // cholesterol metabolic process	GO:0000139 // GO:0005634 // GO:0005783 // GO:0005789 // GO:0005794 // GO:0012507 // GO:0016020 // GO:0016021 // GO:0031410	Golgi membrane // nucleus // endoplasmic reticulum // endoplasmic reticulum membrane // Golgi apparatus // ER to Golgi transport vesicle membrane // membrane // integral to membrane // cytoplasmic vesicle	GO:0003677	DNA binding
znhit2	zinc finger, HIT-type containing 2	777606	1.79	2.07	1.8	8.19	4.55	chr10:27617747-27620724	777606	NM_001077618	chr10	27617747	27620724	-	GO:0008150	biological_process	GO:0005575	cellular_component	GO:0003674	molecular_function
zgc:158852	zgc:158852	565497	0.711	1.18	1.13	5.1	4.51327	chr14:19055668-19056708	565497	NM_001198751	chr14	19055668	19056708	+	GO:0010466	negative regulation of peptidase activity			GO:0004867 // GO:0030414	serine-type endopeptidase inhibitor activity // peptidase inhibitor activity
irf11	interferon regulatory factor 11	792160	1.866	0.37	1.12	4.93	4.40179	chr21:44267649-44273778	792160	NM_205747	chr21	44267649	44273778	+	GO:0006355	regulation of transcription, DNA-dependent			GO:0000975 // GO:0003700	regulatory region DNA binding // sequence-specific DNA binding transcription factor activity
inhbaa	inhibin, beta Aa	30072	3.401	1.46	1.49	6.44	4.32215	chr24:3025823-3037951	30072	NM_130916	chr24	3025823	3037951	-	GO:0031101 // GO:0040007	fin regeneration // growth	GO:0005576	extracellular region	GO:0008083	growth factor activity
mvk	mevalonate kinase	492477	1.768	1.87	1.35	5.76	4.26667	chr5:21277531-21293021	492477	NM_001007349	chr5	21277531	21293021	+	GO:0008152 // GO:0008299 // GO:0016310	metabolic process // isoprenoid biosynthetic process // phosphorylation	GO:0005737	cytoplasm	GO:0000166 // GO:0004496 // GO:0005524 // GO:0016301 // GO:0016740 // GO:0016773	nucleotide binding // mevalonate kinase activity // ATP binding // kinase activity // transferase activity // phosphotransferase activity, alcohol group as acceptor
atf3	activating transcription factor 3	393939	2.656	4.23	7.42	31.18	4.20216	chr20:37819286-37825345	393939	NM_200964	chr20	37819286	37825345	+	GO:0006355 // GO:0009615	regulation of transcription, DNA-dependent // response to virus	GO:0005634	nucleus	GO:0003677 // GO:0003700 // GO:0043565 // GO:0046983	DNA binding // sequence-specific DNA binding transcription factor activity // sequence-specific DNA binding // protein dimerization activity
aldob	aldolase b, fructose-bisphosphate	321664	2.489	139.06	101.51	423.46	4.17161	chr14:22107722-22116461	321664	NM_194367	chr14	22107722	22116461	+	GO:0006096 // GO:0008152	glycolysis // metabolic process	GO:0005575	cellular_component	GO:0003824 // GO:0004332 // GO:0016829	catalytic activity // fructose-bisphosphate aldolase activity // lyase activity
sesn2	sestrin 2	100149745	2.46	3.04	2.76	11.38	4.12319	chr19:45226143-45242419	100149745	NM_001079975	chr19	45226143	45242419	-	GO:0007050	cell cycle arrest	GO:0005634	nucleus
stc2	stanniocalcin 2	544665	3.923	9.6	7.11	29.24	4.11252	chr14:25214782-25220155	544665	NM_001014827	chr14	25214782	25220155	+	GO:0008150	biological_process	GO:0005576	extracellular region	GO:0005179	hormone activity
scarb2	scavenger receptor class B, member 2	192340	3.05	12.89	9.58	39.23	4.09499	chr5:63941830-63956640	192340	NM_173259	chr5	63941830	63956640	+	GO:0007155	cell adhesion	GO:0005764 // GO:0016020	lysosome // membrane	GO:0004872	receptor activity
scarb2	scavenger receptor class B, member 2	192340	3.05	12.89	9.58	39.23	4.09499	chr5:56795118-56809990	192340	NM_173259	chr5	56795118	56809990	+	GO:0007155	cell adhesion	GO:0005764 // GO:0016020	lysosome // membrane	GO:0004872	receptor activity
zgc:110266	zgc:110266	550277	5.573	1.66	1.79	7.22	4.03352	chr15:35200934-35212742	550277	NM_001017614	chr15	35200934	35212742	+			GO:0016021	integral to membrane	GO:0004252	serine-type endopeptidase activity
trib3	tribbles homolog 3 (Drosophila)	405805	5.968	10.69	10.25	41.27	4.02634	chr11:24994383-24999049	405805	NM_212869	chr11	24994383	24999049	+	GO:0006468	protein phosphorylation			GO:0003714 // GO:0004672 // GO:0005524 // GO:0016772	transcription corepressor activity // protein kinase activity // ATP binding // transferase activity, transferring phosphorus-containing groups
zgc:92061	zgc:92061	436656	3.454	682.79	360.1	1444.85	4.01236	chr22:11866207-11869255	436656	NM_001002383	chr22	11866207	11869255	+			GO:0005882	intermediate filament	GO:0005198	structural molecule activity
slc1a4	solute carrier family 1 (glutamate/neutral amino acid transporter), member 4	368885	1.874	9.09	7	28.04	4.00571	chr13:24655879-24671222	368885	NM_001002513	chr13	24655879	24671222	-	GO:0003333 // GO:0006821 // GO:0006835 // GO:0015807 // GO:0015808 // GO:0015811 // GO:0015825 // GO:0015826 // GO:0034220 // GO:0034589 // GO:0035524 // GO:0072337	amino acid transmembrane transport // chloride transport // dicarboxylic acid transport // L-amino acid transport // L-alanine transport // L-cystine transport // L-serine transport // threonine transport // ion transmembrane transport // hydroxyproline transport // proline transmembrane transport // modified amino acid transport	GO:0016020	membrane	GO:0017153	sodium:dicarboxylate symporter activity
zgc:114170	zgc:114170	557352	1.417	0.71	3.36	13.4	3.9881	chr22:19108959-19117477	557352	NM_001030111	chr22	19108959	19117477	+					GO:0005488	binding
pnp5b	purine nucleoside phosphorylase 5b	447889	1.14	1.93	1.33	5.3	3.98496	chr2:58850209-58864538	447889	NM_001004628	chr2	58850209	58864538	+	GO:0006139 // GO:0009116	nucleobase-containing compound metabolic process // nucleoside metabolic process	GO:0005575	cellular_component	GO:0003824 // GO:0004731 // GO:0016763	catalytic activity // purine-nucleoside phosphorylase activity // transferase activity, transferring pentosyl groups
fosl1	FOS-like antigen 1	564241	3.153	0.85	1.27	5.04	3.9685	chr14:31611183-31617315	564241	NM_001161552	chr14	31611183	31617315	-	GO:0006355	regulation of transcription, DNA-dependent	GO:0005634	nucleus	GO:0003677 // GO:0003700 // GO:0043565 // GO:0046983	DNA binding // sequence-specific DNA binding transcription factor activity // sequence-specific DNA binding // protein dimerization activity
zgc:162630	zgc:162630	561924	3.267	3.97	4.67	18.45	3.95075	chr6:58818530-58821727	561924	NM_001082825	chr6	58818530	58821727	+			GO:0005575	cellular_component
si:dkey-25e12.5	si:dkey-25e12.5	100034522	7.177	2.38	2.8	10.99	3.925	chr20:26507804-26561457	100034522	NM_001242996	chr20	26507804	26561457	-	GO:0009396 // GO:0055114	folic acid-containing compound biosynthetic process // oxidation-reduction process			GO:0003824 // GO:0004329 // GO:0004488 // GO:0005524 // GO:0016787	catalytic activity // formate-tetrahydrofolate ligase activity // methylenetetrahydrofolate dehydrogenase (NADP+) activity // ATP binding // hydrolase activity
zgc:171802	zgc:171802	100126017	3.672	0.41	1.43	5.57	3.8951	chr6:39045209-39050006	100126017	NM_001105697	chr6	39045209	39050006	+	GO:0007186	G-protein coupled receptor protein signaling pathway	GO:0016021	integral to membrane
anxa1c	annexin A1c	494158	1.169	273.38	113.33	440.91	3.8905	chr5:67519126-67530512	494158	NM_181760	chr5	67519126	67530512	-					GO:0005509 // GO:0005544	calcium ion binding // calcium-dependent phospholipid binding
zgc:162701	zgc:162701	100003383	2.892	1.29	1.18	4.59	3.88983	chr16:8150793-8157691	100003383	NM_001083579	chr16	8150793	8157691	-	GO:0006695 // GO:0016310	cholesterol biosynthetic process // phosphorylation	GO:0005737	cytoplasm	GO:0004631	phosphomevalonate kinase activity
LOC797250	novel protein similar to H.sapiens solute carrier family 7 (cationic amino acid transporter, y+ system), member 5	797250	1.708	2.69	3.06	11.35	3.70915	chr25:13162594-13200624	797250	NM_001128358	chr25	13162594	13200624	+
bcat1	branched chain aminotransferase 1, cytosolic	337412	1.996	4.1	4.13	15.31	3.70702	chr4:16348150-16365599	337412	NM_200064	chr4	16348150	16365599	+	GO:0008152 // GO:0008652 // GO:0009081 // GO:0009082	metabolic process // cellular amino acid biosynthetic process // branched chain family amino acid metabolic process // branched chain family amino acid biosynthetic process			GO:0003824 // GO:0004084 // GO:0008483 // GO:0016740 // GO:0052654 // GO:0052655 // GO:0052656	catalytic activity // branched-chain-amino-acid transaminase activity // transaminase activity // transferase activity // L-leucine transaminase activity // L-valine transaminase activity // L-isoleucine transaminase activity
slc7a3	solute carrier family 7 (cationic amino acid transporter, y+ system), member 3	492363	6.666	9.08	7.03	25.82	3.67283	chr21:29246063-29281472	492363	NM_001007329	chr21	29246063	29281472	+	GO:0003333 // GO:0006810 // GO:0006865 // GO:0055085	amino acid transmembrane transport // transport // amino acid transport // transmembrane transport	GO:0016020 // GO:0016021	membrane // integral to membrane	GO:0015171	amino acid transmembrane transporter activity
ddx21	DEAD (Asp-Glu-Ala-Asp) box polypeptide 21	799650	2.579	17.96	15.89	58.01	3.65072	chr13:174448-184799	799650	NM_001127335	chr13	174448	184799	+			GO:0005634	nucleus	GO:0003676 // GO:0003677 // GO:0003723 // GO:0004386 // GO:0005524 // GO:0008026 // GO:0016787	nucleic acid binding // DNA binding // RNA binding // helicase activity // ATP binding // ATP-dependent helicase activity // hydrolase activity
LOC799527	similar to chemokine (C-X-C motif) receptor 3.1	799527	2.027	2.1	1.93	7.04	3.64767	chr16:13585368-13588073	799527	NM_001144813	chr16	13585368	13588073	+
zgc:112355	zgc:112355	555962	3.562	5.83	3.59	12.95	3.60724	chr23:46354748-46366951	555962	NM_001030096	chr23	46354748	46366951	-			GO:0005575	cellular_component
znf395b	zinc finger protein 395b	566703	2.297	3.18	1.8	6.48	3.6	chr20:34762351-34779225	566703	NM_001045115	chr20	34762351	34779225	-			GO:0005622	intracellular	GO:0003676 // GO:0008270	nucleic acid binding // zinc ion binding
aars	alanyl-tRNA synthetase	324940	6.691	33.34	32.73	116.59	3.56218	chr18:18416985-18448162	324940	NM_001040035, NM_001044310	chr18	18416985	18448162	-	GO:0006419 // GO:0006419 // GO:0043039 // GO:0043039	alanyl-tRNA aminoacylation // alanyl-tRNA aminoacylation // tRNA aminoacylation // tRNA aminoacylation	GO:0005737 // GO:0005737	cytoplasm // cytoplasm	GO:0000166 // GO:0000166 // GO:0003676 // GO:0003676 // GO:0004812 // GO:0004812 // GO:0004813 // GO:0004813 // GO:0005524 // GO:0005524 // GO:0016876 // GO:0016876	nucleotide binding // nucleotide binding // nucleic acid binding // nucleic acid binding // aminoacyl-tRNA ligase activity // aminoacyl-tRNA ligase activity // alanine-tRNA ligase activity // alanine-tRNA ligase activity // ATP binding // ATP binding // ligase activity, forming aminoacyl-tRNA and related compounds // ligase activity, forming aminoacyl-tRNA and related compounds
oc90	otoconin 90	568941	4.386	2.65	1.34	4.76	3.55224	chr2:43043671-43061470	568941	NM_001080192	chr2	43043671	43061470	-	GO:0016042 // GO:0048840 // GO:0048840	lipid catabolic process // otolith development // otolith development			GO:0004623 // GO:0005509	phospholipase A2 activity // calcium ion binding
cebpb	CCAAT/enhancer binding protein (C/EBP), beta	140814	2.464	15.17	27.72	98.16	3.54113	chr8:29301375-29302892	140814	NM_131884	chr8	29301375	29302892	-	GO:0006355 // GO:0009617	regulation of transcription, DNA-dependent // response to bacterium	GO:0005634	nucleus	GO:0003677 // GO:0003700 // GO:0043565 // GO:0046983	DNA binding // sequence-specific DNA binding transcription factor activity // sequence-specific DNA binding // protein dimerization activity
LOC568697	hypothetical LOC568697	568697	1.213	2.57	2.32	8.11	3.49569	chr14:22233851-22239314	568697	NM_001198864	chr14	22233851	22239314	-
exosc1	exosome component 1	558857	3.679	11.22	9.38	32.77	3.4936	chr1:55240067-55245449	558857	NM_001145567	chr1	55240067	55245449	-			GO:0005730	nucleolus
gtpbp1	GTP binding protein 1	378721	3.727	11.88	12.46	42.77	3.43258	chr3:33574954-33593882	378721	NM_213475	chr3	33574954	33593882	+			GO:0005575	cellular_component	GO:0000166 // GO:0003924 // GO:0005525	nucleotide binding // GTPase activity // GTP binding
zgc:163121	zgc:163121	100038790	3.235	2.54	1.46	4.89	3.34932	chr2:28045791-28068414	100038790	NM_001089570	chr2	28045791	28068414	-	GO:0019752	carboxylic acid metabolic process	GO:0005575	cellular_component	GO:0003824 // GO:0016829 // GO:0016831 // GO:0030170	catalytic activity // lyase activity // carboxy-lyase activity // pyridoxal phosphate binding
ezh1	enhancer of zeste homolog 1 (Drosophila)	664754	7.586	1.38	1.62	5.41	3.33951	chr3:36854483-36886294	664754	NM_001039983	chr3	36854483	36886294	+					GO:0018024	histone-lysine N-methyltransferase activity
lxn	latexin	494053	1.005	7.41	8.1	26.07	3.21852	chr15:1177988-1195587	494053	NM_001008596	chr15	1177988	1195587	-	GO:0008150	biological_process	GO:0005575	cellular_component	GO:0003674	molecular_function
her2	hairy-related 2	30300	0.738	2.57	1.34	4.31	3.21642	chr11:43073538-43074275	30300	NM_131089	chr11	43073538	43074275	-	GO:0006351 // GO:0006355	transcription, DNA-dependent // regulation of transcription, DNA-dependent	GO:0005634	nucleus	GO:0003677	DNA binding
zgc:110152	zgc:110152	550551	9.187	1.92	9.95	31.95	3.21106	chr3:25087412-25095883	550551	NM_001017853	chr3	25087412	25095883	+			GO:0005634	nucleus
serpine1	serpin peptidase inhibitor, clade E (nexin, plasminogen activator inhibitor type 1), member 1	100136840	1.777	3.69	6.56	21	3.20122	chr7:27391456-27395874	100136840	NM_001114559	chr7	27391456	27395874	-	GO:0006955	immune response	GO:0005576 // GO:0005615	extracellular region // extracellular space	GO:0004867 // GO:0005125 // GO:0008009	serine-type endopeptidase inhibitor activity // cytokine activity // chemokine activity
lect2l	leukocyte cell-derived chemotaxin 2 like	567278	2.488	3.22	23.14	73.65	3.1828	chr14:38206899-38208438	567278	NM_001048055	chr14	38206899	38208438	+	GO:0009617	response to bacterium
zgc:158292	zgc:158292	100004879	1.575	1.14	1.28	4.04	3.15625	chr11:46345028-46405133	100004879	NM_001110486	chr11	46345028	46405133	+	GO:0008150	biological_process	GO:0005575	cellular_component	GO:0003674	molecular_function
cki	type I cytokeratin	30328	1.267	14.51	3.32	10.41	3.13554	chr19:5974211-5976170	30328	NM_131108	chr19	5974211	5976170	-			GO:0005882	intermediate filament	GO:0005198	structural molecule activity
aclya	ATP citrate lyase a	436922	5.625	26.5	22.53	69.43	3.08167	chr3:17680730-17737693	436922	NM_001002649	chr3	17680730	17737693	+	GO:0008152 // GO:0044262	metabolic process // cellular carbohydrate metabolic process	GO:0005737	cytoplasm	GO:0000166 // GO:0003824 // GO:0003878 // GO:0004775 // GO:0005488 // GO:0005524 // GO:0016829 // GO:0016874 // GO:0046912	nucleotide binding // catalytic activity // ATP citrate synthase activity // succinate-CoA ligase (ADP-forming) activity // binding // ATP binding // lyase activity // ligase activity // transferase activity, transferring acyl groups, acyl groups converted into alkyl on transfer
zgc:109868	zgc:109868	550522	1.412	15.23	3.58	10.85	3.03073	chr19:5974118-5976183	550522	NM_001017824	chr19	5974118	5976183	-	GO:0008150	biological_process	GO:0005882	intermediate filament	GO:0005198	structural molecule activity
zgc:123218	zgc:123218	641321	1.831	3.47	6.24	18.89	3.02724	chr17:33639334-33646812	641321	NM_001037117	chr17	33639334	33646812	+	GO:0008150	biological_process	GO:0019717	synaptosome	GO:0003674	molecular_function
lpl	lipoprotein lipase	30354	4.65	10.81	11.46	34.47	3.00785	chr22:15770450-15775057	30354	NM_131127	chr22	15770450	15775057	+	GO:0006629	lipid metabolic process			GO:0003824 // GO:0004465 // GO:0016787	catalytic activity // lipoprotein lipase activity // hydrolase activity
dedd1	death effector domain-containing 1	58125	2.596	5.51	5.59	16.81	3.00716	chr16:12544915-12565810	58125	NM_131602	chr16	12544915	12565810	+	GO:0042981	regulation of apoptosis
smad9	MAD homolog 9 (Drosophila)	445564	3.956	6.14	5.99	17.99	3.00334	chr10:35985049-36004159	445564	NM_001004014	chr10	35985049	36004159	-	GO:0006351 // GO:0006355 // GO:0007179	transcription, DNA-dependent // regulation of transcription, DNA-dependent // transforming growth factor beta receptor signaling pathway	GO:0005622 // GO:0005634 // GO:0005667	intracellular // nucleus // transcription factor complex	GO:0003700	sequence-specific DNA binding transcription factor activity
angptl6	angiopoietin-like 6	561927	1.47	7.5	2.88	8.61	2.98958	chr3:55376412-55396284	561927	NM_001014821	chr3	55376412	55396284	-	GO:0007165	signal transduction	GO:0005615	extracellular space	GO:0005102	receptor binding
anxa1a	annexin A1a	334724	1.946	388.63	223.81	668.93	2.98883	chr5:27222730-27227674	334724	NM_181758	chr5	27222730	27227674	-					GO:0004859 // GO:0005509 // GO:0005544	phospholipase inhibitor activity // calcium ion binding // calcium-dependent phospholipid binding
acsl4a	acyl-CoA synthetase long-chain family member 4a	393622	3.851	2.77	2.36	7.05	2.98729	chr14:29459069-29479567	393622	NM_200649	chr14	29459069	29479567	+	GO:0008152	metabolic process	GO:0005575	cellular_component	GO:0003824	catalytic activity
gadd45bb	growth arrest and DNA-damage-inducible, beta b	497646	1.937	2.7	2.62	7.78	2.96947	chr2:36660774-36662820	497646	NM_001012386	chr2	36660774	36662820	+	GO:0001756 // GO:0001756	somitogenesis // somitogenesis
acss1	acyl-CoA synthetase short-chain family member 1	541435	7.469	2.55	3.23	9.57	2.96285	chr17:25675637-25695605	541435	NM_001080656	chr17	25675637	25695605	+	GO:0008152	metabolic process	GO:0005575	cellular_component	GO:0003824 // GO:0003987 // GO:0016208	catalytic activity // acetate-CoA ligase activity // AMP binding
gnmt	glycine N-methyltransferase	403338	1.283	11.43	9.54	28.25	2.96122	chr17:49077694-49091737	403338	NM_212816	chr17	49077694	49091737	-	GO:0006555 // GO:0032259	methionine metabolic process // methylation	GO:0005737	cytoplasm	GO:0005542 // GO:0008168 // GO:0016740 // GO:0017174	folic acid binding // methyltransferase activity // transferase activity // glycine N-methyltransferase activity
bik	BCL2-interacting killer (apoptosis-inducing)	564030	3.001	1.92	1.89	5.58	2.95238	chr4:17911260-17914794	564030	NM_001045038	chr4	17911260	17914794	+	GO:0043065 // GO:0043280	positive regulation of apoptosis // positive regulation of caspase activity
pmaip1	phorbol-12-myristate-13-acetate-induced protein 1	751765	4.674	3.79	2.21	6.52	2.95023	chr10:8746745-8746979	751765	NM_001045474	chr10	8746745	8746979	+	GO:0001836 // GO:0006917 // GO:0006919 // GO:0006974 // GO:0043065 // GO:0043280	release of cytochrome c from mitochondria // induction of apoptosis // activation of caspase activity // response to DNA damage stimulus // positive regulation of apoptosis // positive regulation of caspase activity	GO:0005575	cellular_component	GO:0003674	molecular_function
hsp47	heat shock protein 47	30449	4.273	127.09	92.13	271.33	2.94508	chr15:28732298-28736506	30449	NM_131204	chr15	28732298	28736506	-	GO:0006950 // GO:0010951 // GO:0030162	response to stress // negative regulation of endopeptidase activity // regulation of proteolysis	GO:0005737	cytoplasm	GO:0004867 // GO:0004867	serine-type endopeptidase inhibitor activity // serine-type endopeptidase inhibitor activity
fth1b	ferritin, heavy polypeptide 1b	447823	2.322	4.67	5.6	16.31	2.9125	chr25:3025513-3032475	447823	NM_001004562	chr25	3025513	3032475	+	GO:0006826 // GO:0006879 // GO:0055114	iron ion transport // cellular iron ion homeostasis // oxidation-reduction process	GO:0005575	cellular_component	GO:0005488 // GO:0008199 // GO:0016491 // GO:0046872 // GO:0046914	binding // ferric iron binding // oxidoreductase activity // metal ion binding // transition metal ion binding
vegfaa	vascular endothelial growth factor Aa	30682	4.116	5.49	3.24	9.43	2.91049	chr16:4642265-4671203	30682	NM_001110349, NM_131408	chr16	4642265	4671203	+	GO:0001525 // GO:0001525 // GO:0001525 // GO:0001525 // GO:0001525 // GO:0001525 // GO:0001525 // GO:0001525 // GO:0001568 // GO:0001568 // GO:0001569 // GO:0001569 // GO:0001570 // GO:0001570 // GO:0001570 // GO:0001570 // GO:0001944 // GO:0001944 // GO:0001944 // GO:0001944 // GO:0002040 // GO:0002040 // GO:0002040 // GO:0002040 // GO:0002043 // GO:0002043 // GO:0007202 // GO:0007202 // GO:0007…	angiogenesis // angiogenesis // angiogenesis // angiogenesis // angiogenesis // angiogenesis // angiogenesis // angiogenesis // blood vessel development // blood vessel development // patterning of blood vessels // patterning of blood vessels // vasculogenesis // vasculogenesis // vasculogenesis // vasculogenesis // vasculature development // vasculature development // vasculature development // …	GO:0005576 // GO:0005576 // GO:0005576 // GO:0005576 // GO:0016020 // GO:0016020	extracellular region // extracellular region // extracellular region // extracellular region // membrane // membrane	GO:0005515 // GO:0005515 // GO:0008083 // GO:0008083 // GO:0008083 // GO:0008083	protein binding // protein binding // growth factor activity // growth factor activity // growth factor activity // growth factor activity
foxq1b	forkhead box Q1b	405843	3.585	3.27	1.79	5.19	2.89944	chr20:26713547-26715002	405843	NM_212907	chr20	26713547	26715002	+	GO:0006351 // GO:0006355	transcription, DNA-dependent // regulation of transcription, DNA-dependent	GO:0005634	nucleus	GO:0003677 // GO:0003700 // GO:0043565	DNA binding // sequence-specific DNA binding transcription factor activity // sequence-specific DNA binding
phgdh	phosphoglycerate dehydrogenase	321928	4.184	70.15	38.07	109.96	2.88836	chr9:49173963-49201709	321928	NM_199577	chr9	49173963	49201709	-	GO:0006564 // GO:0008152 // GO:0055114	L-serine biosynthetic process // metabolic process // oxidation-reduction process	GO:0005575	cellular_component	GO:0000166 // GO:0004617 // GO:0016616 // GO:0048037 // GO:0051287	nucleotide binding // phosphoglycerate dehydrogenase activity // oxidoreductase activity, acting on the CH-OH group of donors, NAD or NADP as acceptor // cofactor binding // NAD binding
ved	ventrally expressed dharma/bozozok antagonist	368201	1.023	4.16	2.57	7.42	2.88716	chr10:46355492-46360626	368201	NM_183074	chr10	46355492	46360626	+	GO:0006355 // GO:0009953 // GO:0009953 // GO:0060061	regulation of transcription, DNA-dependent // dorsal/ventral pattern formation // dorsal/ventral pattern formation // Spemann organizer formation	GO:0005634	nucleus	GO:0003677 // GO:0003700 // GO:0043565	DNA binding // sequence-specific DNA binding transcription factor activity // sequence-specific DNA binding
zgc:123272	zgc:123272	641427	2.556	2.71	3.06	8.75	2.85948	chr15:24438369-24447265	641427	NM_001037413	chr15	24438369	24447265	-	GO:0008150	biological_process	GO:0005575	cellular_component	GO:0003674	molecular_function
fosl2	fos-like antigen 2	558921	5.112	4.97	13.03	36.79	2.82348	chr17:41427846-41443740	558921	NM_001082998	chr17	41427846	41443740	+	GO:0006355	regulation of transcription, DNA-dependent	GO:0005634	nucleus	GO:0003677 // GO:0003700 // GO:0043565 // GO:0046983	DNA binding // sequence-specific DNA binding transcription factor activity // sequence-specific DNA binding // protein dimerization activity
pank1a	pantothenate kinase 1a	406789	6.329	5.32	4.83	13.49	2.79296	chr17:23386591-23406844	406789	NM_213480	chr17	23386591	23406844	+	GO:0015937	coenzyme A biosynthetic process	GO:0005575	cellular_component	GO:0004594 // GO:0005524	pantothenate kinase activity // ATP binding
cpb1	carboxypeptidase B1 (tissue)	322412	1.99	4.3	2.32	6.4	2.75862	chr24:4835882-4845404	322412	NM_001110021	chr24	4835882	4845404	-	GO:0006508 // GO:0042221	proteolysis // response to chemical stimulus			GO:0004180 // GO:0004181 // GO:0008270 // GO:0046872	carboxypeptidase activity // metallocarboxypeptidase activity // zinc ion binding // metal ion binding
dars	aspartyl-tRNA synthetase	324025	4.288	44.2	41.73	114.8	2.75102	chr9:10924150-10985039	324025	NM_001077611	chr9	10924150	10985039	+	GO:0006412 // GO:0006418 // GO:0006422	translation // tRNA aminoacylation for protein translation // aspartyl-tRNA aminoacylation	GO:0005737	cytoplasm	GO:0000166 // GO:0003676 // GO:0004812 // GO:0004815 // GO:0005524 // GO:0016874	nucleotide binding // nucleic acid binding // aminoacyl-tRNA ligase activity // aspartate-tRNA ligase activity // ATP binding // ligase activity
cyt1l	type I cytokeratin, enveloping layer, like	792062	1.606	5251.15	3212.36	8818.81	2.74527	chr19:5980624-5982633	792062	NM_001082882	chr19	5980624	5982633	-			GO:0005882	intermediate filament	GO:0005198	structural molecule activity
psat1	phosphoserine aminotransferase 1	327512	2.939	70.54	41.92	114.88	2.74046	chr5:72352361-72365894	327512	NM_200895, NM_199819	chr5	72352361	72365894	-	GO:0006564 // GO:0006564 // GO:0008152 // GO:0008152 // GO:0008652 // GO:0008652	L-serine biosynthetic process // L-serine biosynthetic process // metabolic process // metabolic process // cellular amino acid biosynthetic process // cellular amino acid biosynthetic process			GO:0003824 // GO:0003824 // GO:0004648 // GO:0004648 // GO:0008483 // GO:0008483 // GO:0016740 // GO:0016740 // GO:0030170 // GO:0030170	catalytic activity // catalytic activity // O-phospho-L-serine:2-oxoglutarate aminotransferase activity // O-phospho-L-serine:2-oxoglutarate aminotransferase activity // transaminase activity // transaminase activity // transferase activity // transferase activity // pyridoxal phosphate binding // pyridoxal phosphate binding
cox4i2	cytochrome c oxidase subunit IV isoform 2	393776	0.857	1.89	1.87	5.11	2.73262	chr23:19233046-19239698	393776	NM_200803	chr23	19233046	19239698	+			GO:0005575	cellular_component	GO:0004129	cytochrome-c oxidase activity
cbsb	cystathionine-beta-synthase b	266987	3.553	31.17	25.43	69.17	2.72002	chr9:9404591-9450353	266987	NM_001014345	chr9	9404591	9450353	-	GO:0006535 // GO:0008152 // GO:0019343	cysteine biosynthetic process from serine // metabolic process // cysteine biosynthetic process via cystathionine	GO:0005737	cytoplasm	GO:0003824 // GO:0004122 // GO:0030170	catalytic activity // cystathionine beta-synthase activity // pyridoxal phosphate binding
bcl6ab	B-cell CLL/lymphoma 6a, genome duplicate b	100001936	3.549	9.75	10.44	28.34	2.71456	chr2:9876232-9887088	100001936	NM_001100074	chr2	9876232	9887088	-			GO:0005622 // GO:0005634	intracellular // nucleus	GO:0003676 // GO:0008270 // GO:0046872	nucleic acid binding // zinc ion binding // metal ion binding
zgc:123178	zgc:123178	322404	2.119	42.48	42.45	114.73	2.70271	chr15:6532402-6546523	322404	NM_001079946	chr15	6532402	6546523	-	GO:0008150	biological_process			GO:0003674	molecular_function
slc25a43	solute carrier family 25, member 43	796731	3.029	6.25	6.24	16.81	2.69391	chr14:33741644-33750608	796731	NM_001004497	chr14	33741644	33750608	-	GO:0006810 // GO:0055085	transport // transmembrane transport	GO:0005739 // GO:0005743 // GO:0016020 // GO:0016021	mitochondrion // mitochondrial inner membrane // membrane // integral to membrane	GO:0005488	binding
gtpbp4	GTP binding protein 4	334050	6.569	43.25	43	115.67	2.69	chr2:42462492-42476351	334050	NM_199851	chr2	42462492	42476351	-	GO:0006184	GTP catabolic process			GO:0000166 // GO:0005525	nucleotide binding // GTP binding
dao.2	D-amino-acid oxidase 2	405800	2.024	7.61	3.98	10.64	2.67337	chr5:21954037-21968993	405800	NM_214732	chr5	21954037	21968993	-	GO:0055114	oxidation-reduction process			GO:0000166 // GO:0003884 // GO:0016491 // GO:0016641	nucleotide binding // D-amino-acid oxidase activity // oxidoreductase activity // oxidoreductase activity, acting on the CH-NH2 group of donors, oxygen as acceptor
dap1b	death associated protein 1b	58094	0.938	60.67	50.13	133.41	2.66128	chr9:53975569-53979442	58094	NM_131573	chr9	53975569	53979442	+
nfkbiaa	nuclear factor of kappa light polypeptide gene enhancer in B-cells inhibitor, alpha a	406463	3.044	11.42	10.65	28.06	2.63474	chr20:16922394-16925201	406463	NM_213184	chr20	16922394	16925201	+	GO:0009615	response to virus
LOC100151110	5-oxoprolinase	100151110	5.15	4.6	4.18	10.96	2.62201	chr12:14758791-14827956	100151110	NM_001200059	chr12	14758791	14827956	+
si:busm1-57f23.1	si:busm1-57f23.1	368621	0.921	7.43	8.97	23.4	2.6087	chr10:13199964-13203162	368621	NM_001004512	chr10	13199964	13203162	-					GO:0004869	cysteine-type endopeptidase inhibitor activity
atf4b2	activating transcription factor 4b2	556410	5.598	74.79	64.49	168.2	2.60816	chr3:24489181-24492060	556410	NM_001103192	chr3	24489181	24492060	+	GO:0006355	regulation of transcription, DNA-dependent	GO:0005634	nucleus	GO:0003677 // GO:0003700 // GO:0043565 // GO:0046983	DNA binding // sequence-specific DNA binding transcription factor activity // sequence-specific DNA binding // protein dimerization activity
zic2b	zic family member 2 (odd-paired homolog, Drosophila) b	570746	2.498	12.08	5.93	15.4	2.59696	chr1:28803289-28806087	570746	NM_001001820	chr1	28803289	28806087	+			GO:0005622	intracellular	GO:0003676 // GO:0008270	nucleic acid binding // zinc ion binding
glipr2l	GLI pathogenesis-related 2, like	449805	6.386	3.32	3.76	9.76	2.59574	chr16:29843276-29850421	449805	NM_001005978	chr16	29843276	29850421	+	GO:0008150	biological_process	GO:0005576	extracellular region	GO:0003674	molecular_function
mvp	major vault protein	373081	3.334	42.47	61.63	159.82	2.59322	chr3:15313016-15338952	373081	NM_201325	chr3	15313016	15338952	-			GO:0005634 // GO:0005737 // GO:0030529	nucleus // cytoplasm // ribonucleoprotein complex
junbl	jun B proto-oncogene, like	336038	2.031	15.96	32.39	83.98	2.59278	chr3:8434976-8436626	336038	NM_212750	chr3	8434976	8436626	+	GO:0006355	regulation of transcription, DNA-dependent	GO:0005634	nucleus	GO:0003677 // GO:0003700 // GO:0043565 // GO:0046983	DNA binding // sequence-specific DNA binding transcription factor activity // sequence-specific DNA binding // protein dimerization activity
chac1	ChaC, cation transport regulator-like 1	563855	2.66	88.56	76.02	196.86	2.58958	chr20:28296542-28299071	563855	NM_001110126	chr20	28296542	28299071	+	GO:0006915 // GO:0006986	apoptosis // response to unfolded protein	GO:0005737 // GO:0005829	cytoplasm // cytosol
fsta	follistatin a	100004116	3.821	10.71	13.14	33.86	2.57686	chr5:42130040-42135529	100004116	NM_131037	chr5	42130040	42135529	-	GO:0007275 // GO:0009953 // GO:0009953 // GO:0009994 // GO:0030901 // GO:0043049 // GO:0048263	multicellular organismal development // dorsal/ventral pattern formation // dorsal/ventral pattern formation // oocyte differentiation // midbrain development // otic placode formation // determination of dorsal identity	GO:0005576	extracellular region	GO:0005488	binding
zgc:101798	zgc:101798	572841	3.187	7.07	3.19	8.18	2.56426	chr16:7609537-7638406	572841	NM_001007396	chr16	7609537	7638406	-	GO:0008150	biological_process	GO:0016020 // GO:0016021	membrane // integral to membrane	GO:0003674	molecular_function
vdrb	vitamin D receptor b	564511	4.224	2.69	2.17	5.55	2.5576	chr6:38885926-38935997	564511	NM_001159985	chr6	38885926	38935997	-	GO:0006351 // GO:0006355 // GO:0043401	transcription, DNA-dependent // regulation of transcription, DNA-dependent // steroid hormone mediated signaling pathway	GO:0005634	nucleus	GO:0003677 // GO:0003700 // GO:0003707 // GO:0004872 // GO:0004879 // GO:0008270 // GO:0043565 // GO:0046872	DNA binding // sequence-specific DNA binding transcription factor activity // steroid hormone receptor activity // receptor activity // ligand-dependent nuclear receptor activity // zinc ion binding // sequence-specific DNA binding // metal ion binding
cebpd	CCAAT/enhancer binding protein (C/EBP), delta	140817	1.212	32.8	42.43	108.5	2.55715	chr24:37059303-37060514	140817	NM_131887	chr24	37059303	37060514	+	GO:0006355	regulation of transcription, DNA-dependent	GO:0005634	nucleus	GO:0003677 // GO:0003700 // GO:0043565 // GO:0046983	DNA binding // sequence-specific DNA binding transcription factor activity // sequence-specific DNA binding // protein dimerization activity
ipo8	importin 8	555520	4.832	4.86	4.47	11.4	2.55034	chr4:8432321-8460399	555520	NM_001044334	chr4	8432321	8460399	+	GO:0006886	intracellular protein transport			GO:0005488 // GO:0008565	binding // protein transporter activity
acsbg2	acyl-CoA synthetase bubblegum family member 2	335159	5.379	20.24	13.75	34.93	2.54036	chr8:20695872-20730181	335159	NM_001126379	chr8	20695872	20730181	+	GO:0008152	metabolic process			GO:0003824	catalytic activity
gchfr	GTP cyclohydrolase I feedback regulator	393735	0.779	4.8	4.68	11.79	2.51923	Zv9_scaffold3548:229911-235118	393735	NM_200762	Zv9_scaffold3548	229911	235118	-	GO:0009890	negative regulation of biosynthetic process	GO:0005634 // GO:0005737 // GO:0005829 // GO:0016020 // GO:0031965	nucleus // cytoplasm // cytosol // membrane // nuclear membrane
cebpg	CCAAT/enhancer binding protein (C/EBP), gamma	140816	2.252	19.7	19	47.82	2.51684	chr7:39481806-39487281	140816	NM_131886	chr7	39481806	39487281	+	GO:0006355	regulation of transcription, DNA-dependent	GO:0005634	nucleus	GO:0003677 // GO:0003700 // GO:0043565 // GO:0046983	DNA binding // sequence-specific DNA binding transcription factor activity // sequence-specific DNA binding // protein dimerization activity
iars	isoleucyl-tRNA synthetase	334393	4.25	11.55	13.84	34.82	2.5159	chr11:1302659-1357500	334393	NM_199896	chr11	1302659	1357500	-	GO:0006412 // GO:0006418 // GO:0006428	translation // tRNA aminoacylation for protein translation // isoleucyl-tRNA aminoacylation	GO:0005737	cytoplasm	GO:0000166 // GO:0004812 // GO:0004822 // GO:0005524 // GO:0016874	nucleotide binding // aminoacyl-tRNA ligase activity // isoleucine-tRNA ligase activity // ATP binding // ligase activity
nrg1	neuregulin 1	796461	9.095	2.77	2.13	5.35	2.51174	chr10:5882254-5984608	796461	NM_001044911	chr10	5882254	5984608	-	GO:0001755 // GO:0007422 // GO:0009790 // GO:0021755 // GO:0021778 // GO:0031101	neural crest cell migration // peripheral nervous system development // embryo development // eurydendroid cell differentiation // oligodendrocyte cell fate specification // fin regeneration			GO:0005102	receptor binding
pih1d2	PIH1 domain containing 2	494086	3.692	4.01	2.42	6.06	2.50413	chr15:17101270-17106252	494086	NM_001008629	chr15	17101270	17106252	-	GO:0008150	biological_process	GO:0005575	cellular_component	GO:0003674	molecular_function
zgc:153027	zgc:153027	767774	1.674	3.73	2.96	7.41	2.50338	chr21:8305390-8309563	767774	NM_001076741	chr21	8305390	8309563	+	GO:0001558	regulation of cell growth	GO:0005576	extracellular region	GO:0005520	insulin-like growth factor binding
slc48a1a	solute carrier family 48 (heme transporter), member 1a	436697	1.234	1.57	1.97	4.93	2.50254	chr23:33571411-33575096	436697	NM_001002424	chr23	33571411	33575096	-	GO:0006810	transport	GO:0005764 // GO:0005765 // GO:0005768 // GO:0010008 // GO:0016020 // GO:0016021	lysosome // lysosomal membrane // endosome // endosome membrane // membrane // integral to membrane	GO:0003674	molecular_function
tp53inp1	tumor protein p53 inducible nuclear protein 1	568021	4.108	8.08	9.02	22.26	2.46785	chr16:43226655-43235727	568021	NM_001080036	chr16	43226655	43235727	+	GO:0008150	biological_process	GO:0005575	cellular_component	GO:0003674	molecular_function
nfkb2	nuclear factor of kappa light polypeptide gene enhancer in B-cells 2, p49/p100	415100	7.971	4.16	4.81	11.87	2.46778	chr13:22858195-22875758	415100	NM_001001840	chr13	22858195	22875758	+	GO:0006355 // GO:0007165	regulation of transcription, DNA-dependent // signal transduction	GO:0005634	nucleus	GO:0003700	sequence-specific DNA binding transcription factor activity
zgc:154176	zgc:154176	768160	3.389	4.94	4.57	11.26	2.46389	chr22:148597-155404	768160	NM_001077303	chr22	148597	155404	+			GO:0005575	cellular_component	GO:0008270 // GO:0046872	zinc ion binding // metal ion binding
phlda2	pleckstrin homology-like domain, family A, member 2	553622	1.377	17.92	20.07	49.38	2.46039	chr25:24248136-24249419	553622	NM_001020596	chr25	24248136	24249419	-	GO:0008150	biological_process	GO:0005737 // GO:0016020	cytoplasm // membrane	GO:0003674	molecular_function
c6	complement component 6	393611	4.311	3.48	5.78	14.2	2.45675	chr21:19743334-19760478	393611	NM_200638	chr21	19743334	19760478	-	GO:0006955	immune response	GO:0005579	membrane attack complex
chka	choline kinase alpha	558499	3.279	2.53	2.85	6.96	2.44211	chr18:20903529-20926085	558499	NM_001044865	chr18	20903529	20926085	+	GO:0006657 // GO:0016310	CDP-choline pathway // phosphorylation	GO:0005575	cellular_component	GO:0016301 // GO:0016772 // GO:0016773	kinase activity // transferase activity, transferring phosphorus-containing groups // phosphotransferase activity, alcohol group as acceptor
fam60a	family with sequence similarity 60, member A	563991	3.367	4.92	4.28	10.43	2.43692	chr4:15703630-15712892	563991	NM_001025531	chr4	15703630	15712892	-
asb2b	ankyrin repeat and SOCS box-containing 2b	402848	8.551	5.98	6.66	16.2	2.43243	chr17:53909300-53915808	402848	NM_214725	chr17	53909300	53915808	-	GO:0035556	intracellular signal transduction	GO:0005575	cellular_component	GO:0003674	molecular_function
LOC563601	similar to transmembrane 4 superfamily member 1	563601	0.977	1.45	2.18	5.3	2.43119	chr22:41123700-41127009	563601	NM_001045022	chr22	41123700	41127009	+
caprin1b	cell cycle associated protein 1b	406341	3.154	38.23	37.99	92.26	2.42853	chr18:36685086-36707885	406341	NM_213068	chr18	36685086	36707885	-	GO:0008150	biological_process	GO:0005575	cellular_component	GO:0003674	molecular_function
phlda3	pleckstrin homology-like domain, family A, member 3	368779	1.831	4.02	3.76	9.12	2.42553	chr23:5806310-5809009	368779	NM_001002455	chr23	5806310	5809009	-	GO:0006915 // GO:0042771 // GO:0051898	apoptosis // DNA damage response, signal transduction by p53 class mediator resulting in induction of apoptosis // negative regulation of protein kinase B signaling cascade	GO:0005737 // GO:0005886 // GO:0016020	cytoplasm // plasma membrane // membrane	GO:0005546 // GO:0005547 // GO:0010314 // GO:0032266 // GO:0043325 // GO:0080025	phosphatidylinositol-4,5-bisphosphate binding // phosphatidylinositol-3,4,5-trisphosphate binding // phosphatidylinositol-5-phosphate binding // phosphatidylinositol-3-phosphate binding // phosphatidylinositol-3,4-bisphosphate binding // phosphatidylinositol-3,5-bisphosphate binding
hagh	hydroxyacylglutathione hydrolase	336977	1.739	12.1	12.69	30.74	2.42238	chr3:18596409-18614404	336977	NM_200043	chr3	18596409	18614404	-			GO:0005737 // GO:0005739 // GO:0005759	cytoplasm // mitochondrion // mitochondrial matrix	GO:0004416 // GO:0008270 // GO:0016787 // GO:0046872	hydroxyacylglutathione hydrolase activity // zinc ion binding // hydrolase activity // metal ion binding
zgc:110354	zgc:110354	553612	2.613	1.58	2.13	5.15	2.41784	chr8:19881017-19884779	553612	NM_001020586	chr8	19881017	19884779	+	GO:0008150	biological_process	GO:0005575	cellular_component	GO:0003674	molecular_function
zgc:158276	zgc:158276	790944	1.756	5.46	6.06	14.61	2.41089	chr20:51608937-51644431	790944	NM_001080089	chr20	51608937	51644431	-	GO:0008150	biological_process	GO:0005575	cellular_component	GO:0003674	molecular_function
rnd2	Rho family GTPase 2	751645	1.054	6.29	4.33	10.43	2.40878	chr3:19738162-19786979	751645	NM_001045364	chr3	19738162	19786979	-	GO:0007264	small GTPase mediated signal transduction	GO:0005622 // GO:0016020	intracellular // membrane	GO:0000166 // GO:0005525	nucleotide binding // GTP binding
rsl24d1	ribosomal L24 domain containing 1	406266	1.332	138.47	128.97	309.55	2.40017	chr25:487944-493305	406266	NM_212993	chr25	487944	493305	+	GO:0006412 // GO:0042254	translation // ribosome biogenesis	GO:0005634 // GO:0005730 // GO:0005840	nucleus // nucleolus // ribosome	GO:0003735	structural constituent of ribosome
notum3	notum 3	570510	2.841	5.8	3.49	8.37	2.39828	chr3:58763008-58793078	570510	NM_001161654	chr3	58763008	58793078	+
junb	jun B proto-oncogene	407086	1.53	2.26	15.44	36.86	2.38731	chr1:52226931-52228460	407086	NM_213556	chr1	52226931	52228460	-	GO:0006355 // GO:0060047 // GO:0060047	regulation of transcription, DNA-dependent // heart contraction // heart contraction	GO:0005634	nucleus	GO:0003677 // GO:0003700 // GO:0043565 // GO:0046983	DNA binding // sequence-specific DNA binding transcription factor activity // sequence-specific DNA binding // protein dimerization activity
adamts15	ADAM metallopeptidase with thrombospondin type 1 motif, 15	569571	8.197	1.69	2.95	7.02	2.37966	chr5:31818027-31848085	569571	NM_001126429	chr5	31818027	31848085	+
wu:fb17f05	wu:fb17f05	321502	1.405	33.05	35.47	84.22	2.3744	chr22:11885440-11889698	321502	NM_001199952	chr22	11885440	11889698	+
zgc:92474	zgc:92474	436917	2.129	4.48	3.94	9.35	2.3731	chr11:46406692-46410167	436917	NM_001002644	chr11	46406692	46410167	+	GO:0008150	biological_process	GO:0005575	cellular_component	GO:0003674	molecular_function
zgc:56306	zgc:56306	393285	7.737	3.1	2.58	6.12	2.37209	chr1:28142182-28159022	393285	NM_200315	chr1	28142182	28159022	+			GO:0005575	cellular_component	GO:0005158	insulin receptor binding
slc38a2	solute carrier family 38, member 2	566537	5.359	11.24	11.25	26.66	2.36978	chr4:1459355-1476952	566537	NM_001045104	chr4	1459355	1476952	+	GO:0006810 // GO:0006811 // GO:0006814 // GO:0006865	transport // ion transport // sodium ion transport // amino acid transport	GO:0005886 // GO:0016020 // GO:0016021	plasma membrane // membrane // integral to membrane	GO:0015293	symporter activity
casp9	caspase 9, apoptosis-related cysteine protease	492763	3.594	3.52	3.59	8.49	2.3649	chr23:25261113-25272611	492763	NM_001007404	chr23	25261113	25272611	+	GO:0006508 // GO:0006915 // GO:0042981 // GO:0043065	proteolysis // apoptosis // regulation of apoptosis // positive regulation of apoptosis	GO:0005622	intracellular	GO:0004197 // GO:0008233 // GO:0008234 // GO:0016787	cysteine-type endopeptidase activity // peptidase activity // cysteine-type peptidase activity // hydrolase activity
slc1a5	solute carrier family 1 (neutral amino acid transporter), member 5	100002129	1.647	6.24	3.96	9.36	2.36364	chr15:12160272-12183720	100002129	NM_001190755	chr15	12160272	12183720	-	GO:0006835	dicarboxylic acid transport	GO:0016020	membrane	GO:0017153	sodium:dicarboxylate symporter activity
ccdc125	coiled-coil domain containing 125	565477	1.883	1.65	1.89	4.46	2.35979	chr5:27816113-27826412	565477	NM_001098182	chr5	27816113	27826412	-			GO:0005737	cytoplasm
cxcl12a	chemokine (C-X-C motif) ligand 12a (stromal cell-derived factor 1)	352944	4.139	18.82	17.75	41.88	2.35944	chr13:31028000-31041823	352944	NM_178307	chr13	31028000	31041823	+	GO:0000902 // GO:0001764 // GO:0006955 // GO:0007411 // GO:0007411 // GO:0008285 // GO:0008354 // GO:0009887 // GO:0030239 // GO:0030335 // GO:0030516 // GO:0030900 // GO:0031101 // GO:0031101 // GO:0031290 // GO:0031290 // GO:0042074 // GO:0042074 // GO:0048842 // GO:0048920 // GO:0048920 // GO:0050918 // GO:0050930 // GO:0055002 // GO:0090024	cell morphogenesis // neuron migration // immune response // axon guidance // axon guidance // negative regulation of cell proliferation // germ cell migration // organ morphogenesis // myofibril assembly // positive regulation of cell migration // regulation of axon extension // forebrain development // fin regeneration // fin regeneration // retinal ganglion cell axon guidance // retinal gangli…	GO:0005576 // GO:0005615	extracellular region // extracellular space	GO:0005125 // GO:0008009 // GO:0042056 // GO:0042056	cytokine activity // chemokine activity // chemoattractant activity // chemoattractant activity
socs3a	suppressor of cytokine signaling 3a	335409	3.495	3.2	10.82	25.52	2.3586	chr3:58237025-58239847	335409	NM_199950	chr3	58237025	58239847	-	GO:0035556	intracellular signal transduction	GO:0005575	cellular_component
zgc:136826	zgc:136826	677743	0.481	27.22	31.11	73.28	2.35551	chr25:34826997-34835528	677743	NM_001172680	chr25	34826997	34835528	-	GO:0006412 // GO:0006919 // GO:0045727	translation // activation of caspase activity // positive regulation of translation	GO:0005622 // GO:0005840 // GO:0030529	intracellular // ribosome // ribonucleoprotein complex	GO:0003735 // GO:0046872	structural constituent of ribosome // metal ion binding
frem1a	Fras1 related extracellular matrix 1a	100216326	7.869	12.88	6.92	16.3	2.35549	chr7:72373308-72442252	100216326	NM_001190308	chr7	72373308	72442252	+	GO:0007154 // GO:0007156 // GO:0033333 // GO:0033334	cell communication // homophilic cell adhesion // fin development // fin morphogenesis	GO:0016020 // GO:0016021	membrane // integral to membrane	GO:0005488 // GO:0005509	binding // calcium ion binding
sesn1	sestrin 1	436933	5.156	11.21	13.98	32.88	2.35193	chr20:32263286-32269168	436933	NM_001002660	chr20	32263286	32269168	+	GO:0007050 // GO:0007368	cell cycle arrest // determination of left/right symmetry	GO:0005634	nucleus	GO:0003674	molecular_function
zgc:112009	zgc:112009	550378	1.049	6.34	4.12	9.68	2.34951	chr16:39374535-39378891	550378	NM_001017683	chr16	39374535	39378891	+	GO:0007264 // GO:0015031	small GTPase mediated signal transduction // protein transport			GO:0000166 // GO:0005525	nucleotide binding // GTP binding
bactin2	bactin2	57935	2.149	3891.32	3120.24	7317.51	2.34518	chr3:40520889-40524560	57935	NM_181601	chr3	40520889	40524560	-			GO:0005737 // GO:0005856	cytoplasm // cytoskeleton	GO:0000166 // GO:0005524	nucleotide binding // ATP binding
zgc:112372	zgc:112372	553806	7.568	2.39	3.31	7.75	2.34139	chr3:61284671-61311774	553806	NM_001020768	chr3	61284671	61311774	+	GO:0008150	biological_process	GO:0005575	cellular_component	GO:0003674	molecular_function
nadka	NAD kinase a	550242	1.028	16.91	11.51	26.89	2.33623	Zv9_NA913:1542-10967	550242	NM_001017580	Zv9_NA913	1542	10967	+	GO:0008152 // GO:0016310	metabolic process // phosphorylation			GO:0003951 // GO:0016301	NAD+ kinase activity // kinase activity
mat1a	methionine adenosyltransferase I, alpha	334195	4.785	16.61	15.98	37.32	2.33542	chr13:18677880-18686124	334195	NM_199871	chr13	18677880	18686124	-	GO:0006556 // GO:0006730	S-adenosylmethionine biosynthetic process // one-carbon metabolic process			GO:0000166 // GO:0004478 // GO:0005524 // GO:0016740 // GO:0046872	nucleotide binding // methionine adenosyltransferase activity // ATP binding // transferase activity // metal ion binding
fn1b	fibronectin 1b	334613	9.702	14.6	46.32	107.96	2.33074	chr1:4393291-4432196	334613	NM_001013261	chr1	4393291	4432196	-	GO:0001756 // GO:0001756	somitogenesis // somitogenesis	GO:0005576	extracellular region
maff	v-maf musculoaponeurotic fibrosarcoma oncogene homolog f (avian)	393307	2.64	18.36	17.43	40.58	2.32817	chr12:20437072-20442929	393307	NM_200336	chr12	20437072	20442929	-	GO:0006355 // GO:0045893	regulation of transcription, DNA-dependent // positive regulation of transcription, DNA-dependent	GO:0005634 // GO:0005667	nucleus // transcription factor complex	GO:0003677 // GO:0003677 // GO:0003677 // GO:0003700 // GO:0003700 // GO:0043565 // GO:0046982	DNA binding // DNA binding // DNA binding // sequence-specific DNA binding transcription factor activity // sequence-specific DNA binding transcription factor activity // sequence-specific DNA binding // protein heterodimerization activity
hiat1b	hippocampus abundant transcript 1b	406848	4.058	7.14	6.99	16.25	2.32475	chr22:10823863-10844194	406848	NM_213527	chr22	10823863	10844194	+	GO:0006810 // GO:0055085	transport // transmembrane transport	GO:0005886 // GO:0016020 // GO:0016021	plasma membrane // membrane // integral to membrane	GO:0005215	transporter activity
jun	jun proto-oncogene	335916	1.857	25.27	25.02	58.12	2.32294	chr20:15558608-15560464	335916	NM_199987	chr20	15558608	15560464	+	GO:0006355 // GO:0032321 // GO:0046686 // GO:0051597 // GO:0060070	regulation of transcription, DNA-dependent // positive regulation of Rho GTPase activity // response to cadmium ion // response to methylmercury // canonical Wnt receptor signaling pathway	GO:0005634 // GO:0005667	nucleus // transcription factor complex	GO:0003677 // GO:0003700 // GO:0003700 // GO:0008013 // GO:0043565 // GO:0046983	DNA binding // sequence-specific DNA binding transcription factor activity // sequence-specific DNA binding transcription factor activity // beta-catenin binding // sequence-specific DNA binding // protein dimerization activity
krt8	keratin 8	797433	4.508	740.81	490.74	1136.38	2.31565	chr23:10355857-10360469	797433	NM_200080	chr23	10355857	10360469	-			GO:0005634 // GO:0005654 // GO:0005737 // GO:0005737 // GO:0005882 // GO:0016363 // GO:0045095	nucleus // nucleoplasm // cytoplasm // cytoplasm // intermediate filament // nuclear matrix // keratin filament	GO:0005198	structural molecule activity
ing5a	inhibitor of growth family, member 5a	386591	1.056	2.5	2.57	5.94	2.31128	chr22:2191784-2201651	386591	NM_198211	chr22	2191784	2201651	-					GO:0008270 // GO:0046872	zinc ion binding // metal ion binding
tmbim1	transmembrane BAX inhibitor motif containing 1	449819	1.757	9.57	7.13	16.41	2.30154	chr6:12907958-12933841	449819	NM_001005992	chr6	12907958	12933841	-	GO:0008150	biological_process	GO:0016020 // GO:0016021	membrane // integral to membrane	GO:0003674	molecular_function
socs3b	suppressor of cytokine signaling 3b	406596	2.385	6.7	23.63	54.32	2.29877	chr12:37046023-37050142	406596	NM_213304	chr12	37046023	37050142	-	GO:0035556	intracellular signal transduction	GO:0005575	cellular_component
ms4a17a.7	membrane-spanning 4-domains, subfamily A, member 17A.7	550409	1.803	4.53	7.22	16.59	2.29778	chr4:60747967-60760459	550409	NM_001017714	chr4	60747967	60760459	+			GO:0016021	integral to membrane
sc:d136	sc:d136	100003913	0.773	2.78	3.6	8.27	2.29722	chr15:36713515-36718125	100003913	NM_001098263	chr15	36713515	36718125	+			GO:0016020	membrane
zgc:153286	zgc:153286	767649	1.715	4.73	4.95	11.34	2.29091	chr1:11231668-11240844	767649	NM_001076589	chr1	11231668	11240844	-	GO:0008150	biological_process	GO:0005575	cellular_component	GO:0003674	molecular_function
rdh12l	retinol dehydrogenase 12, like	494176	1.198	2.07	2.2	5.04	2.29091	chr24:33779333-33787781	494176	NM_001009912	chr24	33779333	33787781	-	GO:0008152 // GO:0055114	metabolic process // oxidation-reduction process	GO:0005575	cellular_component	GO:0000166 // GO:0016491	nucleotide binding // oxidoreductase activity
hspb9	heat shock protein, alpha-crystallin-related, 9	100137108	0.659	22.23	13.89	31.82	2.29086	chr3:33437532-33438190	100137108	NM_001114705	chr3	33437532	33438190	+	GO:0006950	response to stress
nadka	NAD kinase a	550242	0.683	10.04	7.61	17.41	2.28778	chr8:55412804-55423548	550242	NM_001017580	chr8	55412804	55423548	-	GO:0008152 // GO:0016310	metabolic process // phosphorylation			GO:0003951 // GO:0016301	NAD+ kinase activity // kinase activity
tmem189	transmembrane protein 189	450031	3.698	13.35	9.87	22.54	2.28369	chr8:29306603-29315883	450031	NM_001006052	chr8	29306603	29315883	+			GO:0005575	cellular_component
asns	asparagine synthetase	394138	5.631	12.9	11.2	25.56	2.28214	chr19:26140026-26163657	394138	NM_201163	chr19	26140026	26163657	-	GO:0006529 // GO:0008152	asparagine biosynthetic process // metabolic process			GO:0004066	asparagine synthase (glutamine-hydrolyzing) activity
slc39a3	solute carrier family 39 (zinc transporter), member 3	792986	3.785	3.09	4.97	11.33	2.27968	chr16:54802848-54809321	792986	NM_001080619	chr16	54802848	54809321	-	GO:0006829 // GO:0010043 // GO:0030001 // GO:0055085 // GO:0071577	zinc ion transport // response to zinc ion // metal ion transport // transmembrane transport // zinc ion transmembrane transport	GO:0016020	membrane	GO:0005385 // GO:0046873	zinc ion transmembrane transporter activity // metal ion transmembrane transporter activity
sqstm1	sequestosome 1	406452	4.308	27.3	24.46	55.74	2.27882	chr14:14448436-14453802	406452	NM_213173	chr14	14448436	14453802	+	GO:0008150	biological_process	GO:0005575	cellular_component	GO:0008270	zinc ion binding
tkt	transketolase	378713	2.893	32.74	31.47	71.35	2.26724	chr23:20401928-20414797	378713	NM_198070	chr23	20401928	20414797	-	GO:0008152	metabolic process			GO:0003824 // GO:0004802 // GO:0016740	catalytic activity // transketolase activity // transferase activity
zgc:136474	zgc:136474	724003	3.201	25	22.98	52.05	2.26501	chr13:46088630-46095477	724003	NM_001045308	chr13	46088630	46095477	-	GO:0008150	biological_process	GO:0005575	cellular_component	GO:0003674	molecular_function
si:dkeyp-87e7.3	si:dkeyp-87e7.3	100008047	1.421	3.01	2.55	5.77	2.26275	chr22:10325708-10329366	100008047	NM_001080994	chr22	10325708	10329366	+	GO:0006813	potassium ion transport	GO:0008076 // GO:0016020	voltage-gated potassium channel complex // membrane	GO:0005249	voltage-gated potassium channel activity
zgc:162925	zgc:162925	567809	3.118	3.9	2.89	6.52	2.25606	chr24:40131818-40158383	567809	NM_001110474	chr24	40131818	40158383	-	GO:0006810 // GO:0006836	transport // neurotransmitter transport	GO:0016020 // GO:0016021	membrane // integral to membrane	GO:0005328 // GO:0015293	neurotransmitter:sodium symporter activity // symporter activity
kdelc1	KDEL (Lys-Asp-Glu-Leu) containing 1	393905	3.477	9.85	7.59	17.12	2.2556	chr9:28431882-28444071	393905	NM_200931	chr9	28431882	28444071	-			GO:0005783 // GO:0005788	endoplasmic reticulum // endoplasmic reticulum lumen	GO:0003674	molecular_function
grtp1a	growth hormone regulated TBC protein 1a	406711	0.794	2.54	1.81	4.08	2.25414	chr1:62326-66662	406711	NM_213402	chr1	62326	66662	-	GO:0032313	regulation of Rab GTPase activity	GO:0005622	intracellular	GO:0005096 // GO:0005097	GTPase activator activity // Rab GTPase activator activity
osbpl2	oxysterol binding protein-like 2	334206	2.275	5.44	4.58	10.31	2.25109	chr23:9615429-9658845	334206	NM_199872	chr23	9615429	9658845	+	GO:0006810 // GO:0006869	transport // lipid transport
sfxn2	sideroflexin 2	334757	2.542	9.95	8.32	18.69	2.24639	chr12:35471440-35485120	334757	NM_212730	chr12	35471440	35485120	+	GO:0006812 // GO:0055085	cation transport // transmembrane transport	GO:0016020	membrane	GO:0008324	cation transmembrane transporter activity
myf5	myogenic factor 5	58097	3.6	3.19	2.56	5.73	2.23828	chr4:20676918-20680797	58097	NM_131576	chr4	20676918	20680797	+	GO:0002074 // GO:0006355 // GO:0007517 // GO:0007517 // GO:0007519 // GO:0007519 // GO:0043282 // GO:0048741 // GO:0055002	extraocular skeletal muscle development // regulation of transcription, DNA-dependent // muscle organ development // muscle organ development // skeletal muscle tissue development // skeletal muscle tissue development // pharyngeal muscle development // skeletal muscle fiber development // striated muscle cell development	GO:0005634 // GO:0005654 // GO:0005730	nucleus // nucleoplasm // nucleolus	GO:0003677	DNA binding
fga	fibrinogen alpha chain	378986	2.664	2.77	2.02	4.52	2.23762	chr1:9142184-9147606	378986	NM_001194989	chr1	9142184	9147606	-	GO:0007165 // GO:0030168 // GO:0051258	signal transduction // platelet activation // protein polymerization	GO:0005577 // GO:0005615	fibrinogen complex // extracellular space	GO:0005102 // GO:0030674	receptor binding // protein binding, bridging
fgf20a	fibroblast growth factor 20a	559630	1.33	0.33	1.98	4.43	2.23737	chr1:15135018-15136275	559630	NM_001037103	chr1	15135018	15136275	-	GO:0031101 // GO:0060249	fin regeneration // anatomical structure homeostasis			GO:0008083	growth factor activity
fpgs	folylpolyglutamate synthase	406746	3.591	3.6	3.57	7.95	2.22689	chr21:6034997-6054777	406746	NM_213437	chr21	6034997	6054777	+	GO:0009058 // GO:0009396	biosynthetic process // folic acid-containing compound biosynthetic process	GO:0005575	cellular_component	GO:0004326 // GO:0005524 // GO:0016874	tetrahydrofolylpolyglutamate synthase activity // ATP binding // ligase activity
tdh	L-threonine dehydrogenase	406528	3.404	76.86	68.26	151.73	2.22282	chr20:19065612-19070182	406528	NM_213245	chr20	19065612	19070182	+	GO:0044237	cellular metabolic process			GO:0000166 // GO:0003824 // GO:0050662	nucleotide binding // catalytic activity // coenzyme binding
zgc:100911	zgc:100911	445247	1.277	4.94	3.29	7.31	2.22188	Zv9_NA918:46762-47274	445247	NM_001003641	Zv9_NA918	46762	47274	-	GO:0008150	biological_process
zgc:153924	zgc:153924	767776	2.84	2.33	1.97	4.37	2.21827	chr5:191700-193982	767776	NM_001076743	chr5	191700	193982	-	GO:0006355	regulation of transcription, DNA-dependent	GO:0005634	nucleus	GO:0003677 // GO:0003700 // GO:0043565 // GO:0046983	DNA binding // sequence-specific DNA binding transcription factor activity // sequence-specific DNA binding // protein dimerization activity
ing5	inhibitor of growth family, member 5a	792168	0.931	2.47	2.72	6.03	2.21691	chr22:2191909-2201651	792168	NM_001100049	chr22	2191909	2201651	-
znf395a	zinc finger protein 395a	571403	6.441	20.37	19.03	41.98	2.20599	chr17:15931678-15949621	571403	NM_001080054	chr17	15931678	15949621	+	GO:0008150	biological_process	GO:0005622	intracellular	GO:0008270	zinc ion binding
nfkbiab	nuclear factor of kappa light polypeptide gene enhancer in B-cells inhibitor, alpha b	323099	1.323	19.73	14.17	31.22	2.20325	chr17:12806077-12810148	323099	NM_199629	chr17	12806077	12810148	+
scel	sciellin	368684	2.153	36.61	21.87	48.18	2.20302	chr9:17822431-17850807	368684	NM_001005304	chr9	17822431	17850807	+					GO:0008270 // GO:0046872	zinc ion binding // metal ion binding
hgd	homogentisate 1,2-dioxygenase	259189	2.636	40.66	32.6	71.7	2.19939	chr24:24567500-24578991	259189	NM_152966	chr24	24567500	24578991	+	GO:0006559 // GO:0006570 // GO:0055114	L-phenylalanine catabolic process // tyrosine metabolic process // oxidation-reduction process			GO:0004411 // GO:0016491 // GO:0016702	homogentisate 1,2-dioxygenase activity // oxidoreductase activity // oxidoreductase activity, acting on single donors with incorporation of molecular oxygen, incorporation of two atoms of oxygen
zgc:172191	zgc:172191	798034	2.204	7.1	8.76	19.25	2.19749	chr19:4655563-4657766	798034	NM_001114461	chr19	4655563	4657766	+	GO:0008150	biological_process	GO:0005575	cellular_component	GO:0003674	molecular_function
zgc:92066	zgc:92066	436651	1.176	235.84	206.49	451.91	2.18853	chr3:32236683-32237975	436651	NM_001002378	chr3	32236683	32237975	+	GO:0006826 // GO:0006879 // GO:0055114	iron ion transport // cellular iron ion homeostasis // oxidation-reduction process	GO:0005575	cellular_component	GO:0005488 // GO:0008199 // GO:0016491 // GO:0046872 // GO:0046914	binding // ferric iron binding // oxidoreductase activity // metal ion binding // transition metal ion binding
nsa2	NSA2 ribosome biogenesis homolog (S. cerevisiae)	321769	1.18	105.6	111.23	243.39	2.18817	chr21:4041163-4047803	321769	NM_199568	chr21	4041163	4047803	-
slc25a1	solute carrier family 25 (mitochondrial carrier; citrate transporter), member 1	393579	1.909	3.76	3.35	7.33	2.18806	chr10:23319646-23328578	393579	NM_200607	chr10	23319646	23328578	+	GO:0006810	transport	GO:0016020 // GO:0016021	membrane // integral to membrane
ucp1	uncoupling protein 1	83908	7.646	7.57	8.79	19.22	2.18658	chr1:53870179-53884602	83908	NM_199523	chr1	53870179	53884602	+	GO:0006810 // GO:0006839 // GO:0042221	transport // mitochondrial transport // response to chemical stimulus	GO:0005739 // GO:0016020 // GO:0016021	mitochondrion // membrane // integral to membrane	GO:0005488	binding
ubxn6	UBX domain protein 6	554960	2.038	10.39	10.19	22.26	2.18449	chr22:22623596-22637779	554960	NM_001044780	chr22	22623596	22637779	+
zgc:91890	zgc:91890	431729	2.047	2.45	2.51	5.48	2.18327	chr16:6853466-6861183	431729	NM_001002182	chr16	6853466	6861183	+	GO:0006810	transport	GO:0005886 // GO:0016020 // GO:0016021	plasma membrane // membrane // integral to membrane	GO:0003674	molecular_function
si:dkey-97m3.1	si:dkey-97m3.1	100034578	2.185	3.31	2.73	5.96	2.18315	chr4:1850469-1875348	100034578	NM_001083089	chr4	1850469	1875348	-	GO:0055114	oxidation-reduction process			GO:0000166 // GO:0016620	nucleotide binding // oxidoreductase activity, acting on the aldehyde or oxo group of donors, NAD or NADP as acceptor
si:ch211-222k6.3	si:ch211-222k6.3	100034442	1.97	5.87	2.95	6.43	2.17966	chr22:10176996-10181446	100034442	NM_001083059	chr22	10176996	10181446	+
cry-dash	cryptochrome DASH	402986	1.919	8.37	3.4	7.41	2.17941	chr24:20802473-20816799	402986	NM_205686	chr24	20802473	20816799	-	GO:0000719 // GO:0006281 // GO:0018298 // GO:0045892	photoreactive repair // DNA repair // protein-chromophore linkage // negative regulation of transcription, DNA-dependent			GO:0003684 // GO:0003904 // GO:0003913 // GO:0050660	damaged DNA binding // deoxyribodipyrimidine photo-lyase activity // DNA photolyase activity // flavin adenine dinucleotide binding
si:dkey-184p18.2	si:dkey-184p18.2	768134	2.194	3.87	4.55	9.91	2.17802	chr19:35644534-35670559	768134	NM_001077280	chr19	35644534	35670559	-	GO:0008150	biological_process	GO:0005575	cellular_component	GO:0003674	molecular_function
bmp7b	bone morphogenetic protein 7b	557567	2.738	8.63	6.1	13.28	2.17705	chr23:6472221-6572912	557567	NM_001077146	chr23	6472221	6572912	-	GO:0040007	growth			GO:0008083	growth factor activity
herpud1	homocysteine-inducible, endoplasmic reticulum stress-inducible, ubiquitin-like domain member 1	565499	2.209	8.42	8.31	18.07	2.17449	chr18:17259897-17267746	565499	NM_001025537	chr18	17259897	17267746	+					GO:0003674	molecular_function
zgc:158766	zgc:158766	100009641	2.634	4.38	2.81	6.1	2.17082	chr16:56652368-56720769	100009641	NM_001083010	chr16	56652368	56720769	+	GO:0008150	biological_process	GO:0005575	cellular_component	GO:0003674	molecular_function
alox12	arachidonate 12-lipoxygenase	322732	7.346	43.29	26.51	57.45	2.16711	chr7:27155601-27173814	322732	NM_199618	chr7	27155601	27173814	+	GO:0006691 // GO:0055114	leukotriene metabolic process // oxidation-reduction process			GO:0005506 // GO:0016165 // GO:0016491 // GO:0016702 // GO:0046872	iron ion binding // lipoxygenase activity // oxidoreductase activity // oxidoreductase activity, acting on single donors with incorporation of molecular oxygen, incorporation of two atoms of oxygen // metal ion binding
tcea3	transcription elongation factor A (SII), 3	402983	2.391	4.85	5.12	11.08	2.16406	chr16:36529278-36552617	402983	NM_205683	chr16	36529278	36552617	+	GO:0006351 // GO:0006354 // GO:0006355 // GO:0006357 // GO:0006414 // GO:0032784	transcription, DNA-dependent // transcription elongation, DNA-dependent // regulation of transcription, DNA-dependent // regulation of transcription from RNA polymerase II promoter // translational elongation // regulation of transcription elongation, DNA-dependent	GO:0005634	nucleus	GO:0003676 // GO:0003677 // GO:0003746 // GO:0008270	nucleic acid binding // DNA binding // translation elongation factor activity // zinc ion binding
wu:fb12c06	wu:fb12c06	561592	3.39	93.87	58.16	125.59	2.15939	chr3:27793500-27798964	561592	NM_001164368	chr3	27793500	27798964	-
zgc:162126	zgc:162126	797943	1.614	9.23	11.43	24.54	2.14698	chr7:75191966-75197309	797943	NM_001082921	chr7	75191966	75197309	+
rasgef1bb	RasGEF domain family, member 1Bb	445085	2.07	5.46	5.9	12.65	2.14407	chr10:9249867-9275152	445085	NM_001003479	chr10	9249867	9275152	+	GO:0007264 // GO:0050790 // GO:0051056	small GTPase mediated signal transduction // regulation of catalytic activity // regulation of small GTPase mediated signal transduction	GO:0005622	intracellular	GO:0005085 // GO:0005088	guanyl-nucleotide exchange factor activity // Ras guanyl-nucleotide exchange factor activity
pea3	ETS-domain transcription factor pea3	30700	4.452	15.26	14	30.01	2.14357	chr12:29107277-29139721	30700	NM_131425	chr12	29107277	29139721	+	GO:0006351 // GO:0006355 // GO:0045893	transcription, DNA-dependent // regulation of transcription, DNA-dependent // positive regulation of transcription, DNA-dependent	GO:0005634	nucleus	GO:0003677 // GO:0003700 // GO:0043565 // GO:0043565	DNA binding // sequence-specific DNA binding transcription factor activity // sequence-specific DNA binding // sequence-specific DNA binding
prdm1a	PR domain containing 1a, with ZNF domain	323473	7.459	8.54	11.9	25.46	2.1395	chr16:8650398-8662772	323473	NM_199515	chr16	8650398	8662772	-	GO:0000122 // GO:0000578 // GO:0007521 // GO:0010629 // GO:0033333 // GO:0035118 // GO:0035138 // GO:0045666 // GO:0051155	negative regulation of transcription from RNA polymerase II promoter // embryonic axis specification // muscle cell fate determination // negative regulation of gene expression // fin development // embryonic pectoral fin morphogenesis // pectoral fin morphogenesis // positive regulation of neuron differentiation // positive regulation of striated muscle cell differentiation	GO:0005622	intracellular	GO:0003676 // GO:0003700 // GO:0008270	nucleic acid binding // sequence-specific DNA binding transcription factor activity // zinc ion binding
nog2	noggin 2	30185	2.627	7.44	6.96	14.84	2.13218	chr24:40328522-40330513	30185	NM_130992	chr24	40328522	40330513	-	GO:0007275 // GO:0030154 // GO:0030514 // GO:0045596 // GO:0051216	multicellular organismal development // cell differentiation // negative regulation of BMP signaling pathway // negative regulation of cell differentiation // cartilage development	GO:0005576	extracellular region	GO:0003674	molecular_function
cyp3c1	cytochrome P450, family 3, subfamily c, polypeptide 1	324340	5.8	15.25	17.37	36.97	2.12838	chr3:40964025-40971314	324340	NM_212673	chr3	40964025	40971314	-	GO:0055114	oxidation-reduction process			GO:0004497 // GO:0005506 // GO:0009055 // GO:0016491 // GO:0016705 // GO:0020037 // GO:0020037 // GO:0046872	monooxygenase activity // iron ion binding // electron carrier activity // oxidoreductase activity // oxidoreductase activity, acting on paired donors, with incorporation or reduction of molecular oxygen // heme binding // heme binding // metal ion binding
cth	cystathionase (cystathionine gamma-lyase)	322055	2.757	15.58	17.3	36.77	2.12543	chr6:37357906-37371181	322055	NM_212604	chr6	37357906	37371181	-	GO:0006520	cellular amino acid metabolic process			GO:0003824 // GO:0016829 // GO:0030170	catalytic activity // lyase activity // pyridoxal phosphate binding
spsb4b	splA/ryanodine receptor domain and SOCS box containing 4b	445080	1.44	3.45	2.48	5.26	2.12097	chr15:40196648-40203586	445080	NM_001003474	chr15	40196648	40203586	-	GO:0035556	intracellular signal transduction	GO:0005575	cellular_component	GO:0004872	receptor activity
cldn1	claudin 1	81590	2.405	77.15	46.67	98.98	2.12085	chr2:88612-91786	81590	NM_131770	chr2	88612	91786	-			GO:0005886 // GO:0005923 // GO:0016020 // GO:0016021 // GO:0030054	plasma membrane // tight junction // membrane // integral to membrane // cell junction	GO:0005198	structural molecule activity
ptgs2a	prostaglandin-endoperoxide synthase 2a	246227	2.714	24.03	22.25	47.14	2.11865	chr2:20712497-20719864	246227	NM_153657	chr2	20712497	20719864	-	GO:0006979 // GO:0042221 // GO:0055114 // GO:0055114	response to oxidative stress // response to chemical stimulus // oxidation-reduction process // oxidation-reduction process			GO:0004601 // GO:0004601 // GO:0020037	peroxidase activity // peroxidase activity // heme binding
cyp1a	cytochrome P450, family 1, subfamily A	140634	2.605	27.91	21.49	45.48	2.11633	chr18:4974676-4985563	140634	NM_131879	chr18	4974676	4985563	+	GO:0006725 // GO:0009410 // GO:0042221 // GO:0042221 // GO:0042221 // GO:0055114	cellular aromatic compound metabolic process // response to xenobiotic stimulus // response to chemical stimulus // response to chemical stimulus // response to chemical stimulus // oxidation-reduction process			GO:0004497 // GO:0005506 // GO:0009055 // GO:0016491 // GO:0016705 // GO:0016712 // GO:0020037 // GO:0046872	monooxygenase activity // iron ion binding // electron carrier activity // oxidoreductase activity // oxidoreductase activity, acting on paired donors, with incorporation or reduction of molecular oxygen // oxidoreductase activity, acting on paired donors, with incorporation or reduction of molecular oxygen, reduced flavin or flavoprotein as one donor, and incorporation of one atom of oxygen // h…
cecr1a	cat eye syndrome chromosome region, candidate 1a	373884	10.32	4.39	4.08	8.62	2.11275	chr25:17046694-17057977	373884	NM_001033717	chr25	17046694	17057977	+	GO:0006154 // GO:0009168	adenosine catabolic process // purine ribonucleoside monophosphate biosynthetic process	GO:0005576 // GO:0005615 // GO:0005615	extracellular region // extracellular space // extracellular space	GO:0004000 // GO:0004000 // GO:0008270 // GO:0016787 // GO:0019239 // GO:0031685 // GO:0043394 // GO:0046872	adenosine deaminase activity // adenosine deaminase activity // zinc ion binding // hydrolase activity // deaminase activity // adenosine receptor binding // proteoglycan binding // metal ion binding
fuca1	fucosidase, alpha-L- 1, tissue	335494	3.126	57.03	41.16	86.62	2.10447	chr19:33870883-33875722	335494	NM_212740	chr19	33870883	33875722	-	GO:0005975 // GO:0006004	carbohydrate metabolic process // fucose metabolic process			GO:0003824 // GO:0004560 // GO:0043169	catalytic activity // alpha-L-fucosidase activity // cation binding
zgc:100911	zgc:100911	445247	0.973	2.71	2.4	5.05	2.10417	chr23:44875598-44889708	445247	NM_001003641	chr23	44875598	44889708	+	GO:0008150	biological_process
gli1	GLI-Kruppel family member 1	352930	6.238	3.83	3.18	6.68	2.10063	chr1:30667486-30744301	352930	NM_178296	chr1	30667486	30744301	+	GO:0007420 // GO:0021508 // GO:0021508 // GO:0021521 // GO:0021983 // GO:0021984 // GO:0030182 // GO:0031290 // GO:0045880 // GO:0048699 // GO:0048699 // GO:0048855 // GO:0050767 // GO:0050767	brain development // floor plate formation // floor plate formation // ventral spinal cord interneuron specification // pituitary gland development // adenohypophysis development // neuron differentiation // retinal ganglion cell axon guidance // positive regulation of smoothened signaling pathway // generation of neurons // generation of neurons // adenohypophysis morphogenesis // regulation of …	GO:0005622 // GO:0035301	intracellular // Hedgehog signaling complex	GO:0003676 // GO:0005515 // GO:0008270	nucleic acid binding // protein binding // zinc ion binding
hsd3b7	hydroxy-delta-5-steroid dehydrogenase, 3 beta- and steroid delta-isomerase	327462	5.583	13.72	11.59	24.33	2.09922	chr3:32886669-32915223	327462	NM_199809	chr3	32886669	32915223	+	GO:0006694 // GO:0055114	steroid biosynthetic process // oxidation-reduction process	GO:0005575	cellular_component	GO:0000166 // GO:0003854 // GO:0016491 // GO:0016616 // GO:0016853	nucleotide binding // 3-beta-hydroxy-delta5-steroid dehydrogenase activity // oxidoreductase activity // oxidoreductase activity, acting on the CH-OH group of donors, NAD or NADP as acceptor // isomerase activity
si:dkey-9i23.16	si:dkey-9i23.16	571915	1.318	7.53	10.33	21.68	2.09874	chr1:45396509-45401702	571915	NM_001145611	chr1	45396509	45401702	+			GO:0016021	integral to membrane
mogat3a	monoacylglycerol O-acyltransferase 3a	100142647	1.319	4.26	3.18	6.66	2.09434	chr23:45615313-45625828	100142647	NM_001122623	chr23	45615313	45625828	+			GO:0005575	cellular_component	GO:0016747	transferase activity, transferring acyl groups other than amino-acyl groups
inhbb	inhibin, beta B	30275	3.63	9.43	6.96	14.57	2.09339	chr9:38019604-38027186	30275	NM_131068	chr9	38019604	38027186	+	GO:0040007	growth	GO:0005576	extracellular region	GO:0005179 // GO:0008083	hormone activity // growth factor activity
wnt5a	wingless-type MMTV integration site family, member 5a	568191	1.321	3.07	2.31	4.83	2.09091	chr8:55917047-55926770	568191	NM_001079834	chr8	55917047	55926770	+	GO:0001756 // GO:0001843 // GO:0001947 // GO:0002053 // GO:0003323 // GO:0003344 // GO:0007223 // GO:0007275 // GO:0009950 // GO:0016055 // GO:0030514 // GO:0035121 // GO:0040037 // GO:0042733 // GO:0043507 // GO:0046330 // GO:0048546 // GO:0050679 // GO:0060029 // GO:0060071 // GO:0060157 // GO:0060541 // GO:0060599 // GO:0060744 // GO:0060750 // GO:0060762 // GO:0061036 // GO:0071425 // GO:0071…	somitogenesis // neural tube closure // heart looping // positive regulation of mesenchymal cell proliferation // type B pancreatic cell development // pericardium morphogenesis // Wnt receptor signaling pathway, calcium modulating pathway // multicellular organismal development // dorsal/ventral axis specification // Wnt receptor signaling pathway // negative regulation of BMP signaling pathway …	GO:0005576 // GO:0005578 // GO:0005615 // GO:0005886	extracellular region // proteinaceous extracellular matrix // extracellular space // plasma membrane	GO:0005102 // GO:0005110	receptor binding // frizzled-2 binding
si:ch211-102c2.6	si:ch211-102c2.6	407646	2.41	2.24	2.35	4.91	2.08936	chr5:28440051-28450650	407646	NM_001123231	chr5	28440051	28450650	+	GO:0015889	cobalamin transport			GO:0031419	cobalamin binding
s100b	S100 calcium binding protein, beta (neural)	436825	1.225	4.9	5.9	12.31	2.08644	chr22:13991251-13995408	436825	NM_001002552	chr22	13991251	13995408	-					GO:0005509	calcium ion binding
LOC559803	novel protein similar to SWI/SNF related, matrix associated, actin dependent regulator of chromatin, subfamily a, member 5 (smarca5)	559803	4.061	2.13	1.98	4.13	2.08586	chr5:23636645-23671567	559803	NM_001099997	chr5	23636645	23671567	-
mknk1	MAP kinase interacting serine/threonine kinase 1	555974	3.647	9.98	9.38	19.54	2.08316	chr11:13362086-13375267	555974	NM_001114739	chr11	13362086	13375267	+	GO:0006468 // GO:0016310	protein phosphorylation // phosphorylation	GO:0005575	cellular_component	GO:0000166 // GO:0004672 // GO:0004674 // GO:0005524 // GO:0016301 // GO:0016740 // GO:0016772	nucleotide binding // protein kinase activity // protein serine/threonine kinase activity // ATP binding // kinase activity // transferase activity // transferase activity, transferring phosphorus-containing groups
kal1b	Kallmann syndrome 1b sequence	30652	6.771	9.51	9.87	20.47	2.07396	chr22:41869295-41959133	30652	NM_131379	chr22	41869295	41959133	+			GO:0005576	extracellular region	GO:0030414	peptidase inhibitor activity
fos	v-fos FBJ murine osteosarcoma viral oncogene homolog	394198	2.213	4.65	13.83	28.68	2.07375	chr20:46803310-46805421	394198	NM_205569	chr20	46803310	46805421	-	GO:0006355	regulation of transcription, DNA-dependent	GO:0005634	nucleus	GO:0003677 // GO:0003690 // GO:0003700 // GO:0043565 // GO:0046983	DNA binding // double-stranded DNA binding // sequence-specific DNA binding transcription factor activity // sequence-specific DNA binding // protein dimerization activity
adipor2	adiponectin receptor 2	560140	9.041	23.64	19.98	41.41	2.07257	chr4:7452006-7489114	560140	NM_001025506	chr4	7452006	7489114	-			GO:0016021	integral to membrane	GO:0004872	receptor activity
zgc:55813	zgc:55813	399488	4.302	22.17	20.09	41.61	2.07118	chr21:26114870-26119364	399488	NM_201514	chr21	26114870	26119364	+	GO:0005975	carbohydrate metabolic process			GO:0003824 // GO:0043169	catalytic activity // cation binding
krt18	keratin 18	352912	2.722	302.19	324.77	670.63	2.06494	chr23:10454084-10457980	352912	NM_178437	chr23	10454084	10457980	+			GO:0005882	intermediate filament	GO:0005198	structural molecule activity
mcl1a	myeloid cell leukemia sequence 1a	58122	3.852	25.81	28.08	57.82	2.05912	chr19:358761-363093	58122	NM_131599	chr19	358761	363093	+	GO:0001894 // GO:0042981 // GO:0043009 // GO:0043066 // GO:0043154	tissue homeostasis // regulation of apoptosis // chordate embryonic development // negative regulation of apoptosis // negative regulation of caspase activity
wu:fb12e11	wu:fb12e11	556585	4.292	23.95	40.86	84.01	2.05605	chr16:45866128-45879502	556585	NM_001199721	chr16	45866128	45879502	-
si:ch211-235o23.1	si:ch211-235o23.1	570302	0.867	2.62	2.32	4.77	2.05603	chr2:42317501-42325142	570302	NM_001130853	chr2	42317501	42325142	+			GO:0016020 // GO:0016021	membrane // integral to membrane
zgc:101810	zgc:101810	493612	1.423	49.27	34.42	70.76	2.05578	chr7:8207682-8226400	493612	NM_001007772	chr7	8207682	8226400	-	GO:0008150	biological_process
ing3	inhibitor of growth family, member 3	393911	3.796	13.21	11.47	23.56	2.05405	chr4:9668648-9679879	393911	NM_200937	chr4	9668648	9679879	+					GO:0008270 // GO:0046872	zinc ion binding // metal ion binding
bcar3	breast cancer anti-estrogen resistance 3	570610	3.915	6.34	5.41	11.11	2.0536	chr8:15601337-15679281	570610	NM_001113620	chr8	15601337	15679281	-	GO:0007264	small GTPase mediated signal transduction	GO:0005622	intracellular	GO:0005085	guanyl-nucleotide exchange factor activity
zgc:136894	zgc:136894	723998	1.762	2.79	3.01	6.18	2.05316	chr16:15829388-15839582	723998	NM_001045303	chr16	15829388	15839582	-			GO:0005622	intracellular	GO:0008270 // GO:0046872	zinc ion binding // metal ion binding
zgc:158345	zgc:158345	100009644	1.268	15.46	10.75	22.06	2.05209	chr2:81939-87432	100009644	NM_001083013	chr2	81939	87432	+	GO:0008150	biological_process	GO:0005575	cellular_component	GO:0003674	molecular_function
etv5b	ets variant 5b	30452	2.736	18.99	15.32	31.42	2.05091	chr6:13942622-13949403	30452	NM_131205	chr6	13942622	13949403	-	GO:0006355	regulation of transcription, DNA-dependent	GO:0005634	nucleus	GO:0003677 // GO:0003700 // GO:0043565 // GO:0043565	DNA binding // sequence-specific DNA binding transcription factor activity // sequence-specific DNA binding // sequence-specific DNA binding
hoxa5a	homeo box A5a	58055	2.988	4.35	3.26	6.68	2.04908	chr19:19225441-19226631	58055	NM_131540	chr19	19225441	19226631	+	GO:0006351 // GO:0006355 // GO:0007275	transcription, DNA-dependent // regulation of transcription, DNA-dependent // multicellular organismal development	GO:0005634	nucleus	GO:0003677 // GO:0003700 // GO:0043565	DNA binding // sequence-specific DNA binding transcription factor activity // sequence-specific DNA binding
wipi1	WD repeat domain, phosphoinositide interacting 1	393362	4.329	10.94	9.08	18.56	2.04405	chr3:36284159-36305521	393362	NM_200391	chr3	36284159	36305521	+	GO:0016236	macroautophagy	GO:0005829 // GO:0034045 // GO:0070772	cytosol // pre-autophagosomal structure membrane // PAS complex	GO:0030331 // GO:0032266 // GO:0050681 // GO:0080025	estrogen receptor binding // phosphatidylinositol-3-phosphate binding // androgen receptor binding // phosphatidylinositol-3,5-bisphosphate binding
fabp7a	fatty acid binding protein 7, brain, a	58128	2.185	53.57	77.18	157.45	2.04004	chr17:15274767-15277114	58128	NM_131605	chr17	15274767	15277114	+	GO:0006810	transport			GO:0005215 // GO:0005488 // GO:0005504 // GO:0008289	transporter activity // binding // fatty acid binding // lipid binding
aspg	asparaginase homolog (S. cerevisiae)	100124594	2.595	3.17	3.27	6.67	2.03976	chr17:45905649-45942108	100124594	NM_001102621	chr17	45905649	45942108	+	GO:0006520	cellular amino acid metabolic process	GO:0005575	cellular_component	GO:0004067	asparaginase activity
il6st	interleukin 6 signal transducer	100006778	3.478	4.44	9.39	19.08	2.03195	chr10:7783983-7803832	100006778	NM_001113504	chr10	7783983	7803832	-	GO:0048861 // GO:0070120	leukemia inhibitory factor signaling pathway // ciliary neurotrophic factor-mediated signaling pathway
stat3	signal transduction and activation of transcription 3	30767	4.655	5.09	8.5	17.27	2.03176	chr3:16650646-16727426	30767	NM_131479	chr3	16650646	16727426	+	GO:0001736 // GO:0001837 // GO:0006355 // GO:0007165 // GO:0008045 // GO:0030010 // GO:0042074 // GO:0043526 // GO:0060252	establishment of planar polarity // epithelial to mesenchymal transition // regulation of transcription, DNA-dependent // signal transduction // motor axon guidance // establishment of cell polarity // cell migration involved in gastrulation // neuroprotection // positive regulation of glial cell proliferation	GO:0005634	nucleus	GO:0003700 // GO:0004871 // GO:0005509	sequence-specific DNA binding transcription factor activity // signal transducer activity // calcium ion binding
zgc:172142	zgc:172142	100136846	5.846	2.98	2.64	5.36	2.0303	chr24:39164155-39183931	100136846	NM_001114565	chr24	39164155	39183931	-	GO:0008150	biological_process	GO:0005575	cellular_component	GO:0003674	molecular_function
zgc:64114	zgc:64114	378866	1.333	3.03	3.05	6.18	2.02623	chr12:49633438-49635562	378866	NM_200107	chr12	49633438	49635562	+	GO:0006915 // GO:0009968	apoptosis // negative regulation of signal transduction	GO:0005737 // GO:0005737	cytoplasm // cytoplasm
phospho1	phosphatase, orphan 1	100002812	4.006	5.6	3.27	6.61	2.02141	chr3:15410534-15414836	100002812	NM_001003461	chr3	15410534	15414836	+	GO:0008152 // GO:0030500	metabolic process // regulation of bone mineralization	GO:0005575	cellular_component	GO:0016787 // GO:0016791 // GO:0046872	hydrolase activity // phosphatase activity // metal ion binding
pim1	pim-1 oncogene	58054	2.459	6.36	6.74	13.62	2.02077	chr8:9472730-9478902	58054	NM_131539	chr8	9472730	9478902	+	GO:0006468 // GO:0006468 // GO:0006468 // GO:0016310 // GO:0030097	protein phosphorylation // protein phosphorylation // protein phosphorylation // phosphorylation // hemopoiesis			GO:0000166 // GO:0004672 // GO:0004674 // GO:0004674 // GO:0005524 // GO:0005524 // GO:0016301 // GO:0016740 // GO:0016772	nucleotide binding // protein kinase activity // protein serine/threonine kinase activity // protein serine/threonine kinase activity // ATP binding // ATP binding // kinase activity // transferase activity // transferase activity, transferring phosphorus-containing groups
mhc1ze	major histocompatibility complex class I ZE gene	378479	0.561	3.47	2.95	5.96	2.02034	chr1:47617711-47618581	378479	NM_194425	chr1	47617711	47618581	-	GO:0006955 // GO:0019882	immune response // antigen processing and presentation	GO:0016020 // GO:0016021 // GO:0042612	membrane // integral to membrane // MHC class I protein complex
ptgs2b	prostaglandin-endoperoxide synthase 2b	559020	2.533	2.65	4.98	10.06	2.02008	chr20:34146431-34152005	559020	NM_001025504	chr20	34146431	34152005	-	GO:0006979 // GO:0042221 // GO:0055114 // GO:0055114	response to oxidative stress // response to chemical stimulus // oxidation-reduction process // oxidation-reduction process			GO:0004601 // GO:0004601 // GO:0020037	peroxidase activity // peroxidase activity // heme binding
ptgds	prostaglandin D2 synthase	336492	2.176	203.99	169.66	342.61	2.01939	chr24:17576418-17578440	336492	NM_213634	chr24	17576418	17578440	-	GO:0006629 // GO:0006810	lipid metabolic process // transport			GO:0001972 // GO:0004667 // GO:0005215 // GO:0005488	retinoic acid binding // prostaglandin-D synthase activity // transporter activity // binding
vps13a	vacuolar protein sorting 13 homolog A (S. cerevisiae)	378837	11.342	6.59	7.14	14.41	2.01821	chr8:54270452-54369808	378837	NM_001118893	chr8	54270452	54369808	-	GO:0008104	protein localization
eif4ebp3	eukaryotic translation initiation factor 4E binding protein 3	492482	0.87	6.27	6.7	13.52	2.01791	chr21:25794819-25799732	492482	NM_001007354	chr21	25794819	25799732	-	GO:0045947	negative regulation of translational initiation	GO:0005575	cellular_component	GO:0008190	eukaryotic initiation factor 4E binding
onecutl	one cut domain, family member, like	246225	6.113	2.35	2.37	4.77	2.01266	chr16:31783448-31787661	246225	NM_152984	chr16	31783448	31787661	-	GO:0006355	regulation of transcription, DNA-dependent	GO:0005634	nucleus	GO:0003677 // GO:0003700 // GO:0043565	DNA binding // sequence-specific DNA binding transcription factor activity // sequence-specific DNA binding
skilb	SKI-like oncogene b	100170835	2.249	2.09	2.1	4.22	2.00952	chr24:27169943-27180580	100170835	NM_001130669	chr24	27169943	27180580	-	GO:0008150	biological_process	GO:0005634	nucleus	GO:0000166 // GO:0005488	nucleotide binding // binding
sp9	sp9 transcription factor	405896	8.568	22.88	19.82	39.64	2	chr9:2590373-2592902	405896	NM_212960	chr9	2590373	2592902	-	GO:0006351 // GO:0006355 // GO:0035118 // GO:0045743	transcription, DNA-dependent // regulation of transcription, DNA-dependent // embryonic pectoral fin morphogenesis // positive regulation of fibroblast growth factor receptor signaling pathway	GO:0005622 // GO:0005634	intracellular // nucleus	GO:0003676 // GO:0003677 // GO:0008270 // GO:0046872	nucleic acid binding // DNA binding // zinc ion binding // metal ion binding
pth1rb	parathyroid hormone 1 receptor b	30651	2.143	1.73	2.02	4.04	2	chr12:10011659-10049021	30651	NM_131378	chr12	10011659	10049021	-	GO:0007165 // GO:0007166 // GO:0007186	signal transduction // cell surface receptor linked signaling pathway // G-protein coupled receptor protein signaling pathway	GO:0005886 // GO:0016020 // GO:0016021	plasma membrane // membrane // integral to membrane	GO:0004871 // GO:0004872 // GO:0004888 // GO:0004930 // GO:0004991	signal transducer activity // receptor activity // transmembrane signaling receptor activity // G-protein coupled receptor activity // parathyroid hormone receptor activity

## Sheet: Downregulated genes
Supplementary File 1. The list of transcripts that are upregulated or downregulated in the amputated fin fold of the clo mutant.
Gene Symbol	Descriptions	Entrez GeneID (including FAR)	Gene Length (kb)	final RPKM WT uncut	final RPKM WT cut	final RPKM clo cut	clo 6hpa final RPKM/WT 6hpa final RPKM	Link to UCSC	GeneID Link to NCBI	RNA accession Link to NCBI	Chromosome	Start	End	Orientation	Biological Process (GOID)	Biological Process (GOTerm)	Cellular Component (GOID)	Cellular Component (GOTerm)	Molecular Function (GOID)	Molecular Function (GOTerm)	KEGG Pathway
lyz	lysozyme	677744	4.099	67.81	116.83	5.35	0.045793	chr24:24643811-24646731	677744	NM_139180	chr24	24643811	24646731	-	GO:0016998	cell wall macromolecule catabolic process			GO:0003796	lysozyme activity
alas2	aminolevulinate, delta-, synthetase 2	64607	5.073	52.82	62.05	4.4	0.0709106	chr8:21891958-21907046	64607	NM_131682	chr8	21891958	21907046	+	GO:0001666 // GO:0006778 // GO:0006783 // GO:0006783 // GO:0006783 // GO:0008152 // GO:0009058 // GO:0020027 // GO:0030218 // GO:0033014 // GO:0035162 // GO:0042541	response to hypoxia // porphyrin-containing compound metabolic process // heme biosynthetic process // heme biosynthetic process // heme biosynthetic process // metabolic process // biosynthetic process // hemoglobin metabolic process // erythrocyte differentiation // tetrapyrrole biosynthetic process // embryonic hemopoiesis // hemoglobin biosynthetic process	GO:0005739 // GO:0005743 // GO:0005759	mitochondrion // mitochondrial inner membrane // mitochondrial matrix	GO:0003824 // GO:0003870 // GO:0003870 // GO:0016740 // GO:0016746 // GO:0016769 // GO:0030170	catalytic activity // 5-aminolevulinate synthase activity // 5-aminolevulinate synthase activity // transferase activity // transferase activity, transferring acyl groups // transferase activity, transferring nitrogenous groups // pyridoxal phosphate binding
hbbe2	hemoglobin beta embryonic-2	405772	3.282	178.36	162.74	13.65	0.0838761	chr12:21702360-21703066	405772	NM_212846	chr12	21702360	21703066	-	GO:0006810 // GO:0015671	transport // oxygen transport	GO:0005833	hemoglobin complex	GO:0005344 // GO:0005506 // GO:0019825 // GO:0020037 // GO:0046872	oxygen transporter activity // iron ion binding // oxygen binding // heme binding // metal ion binding
hbae3	hemoglobin alpha embryonic-3	30601	0.478	3237.38	3125.87	266	0.0850963	chr3:55998282-55999403	30601	NM_183066	chr3	55998282	55999403	-	GO:0006810 // GO:0015671	transport // oxygen transport	GO:0005833	hemoglobin complex	GO:0005344 // GO:0005506 // GO:0019825 // GO:0020037 // GO:0046872	oxygen transporter activity // iron ion binding // oxygen binding // heme binding // metal ion binding
hbbe1.1	hemoglobin beta embryonic-1.1	81538	0.444	1957.86	2304.53	196.83	0.08541	chr3:55965826-55966464	81538	NM_198073	chr3	55965826	55966464	+	GO:0006810 // GO:0015671	transport // oxygen transport	GO:0005833	hemoglobin complex	GO:0005344 // GO:0005506 // GO:0019825 // GO:0020037 // GO:0046872	oxygen transporter activity // iron ion binding // oxygen binding // heme binding // metal ion binding
si:busm1-118j2.5	si:busm1-118j2.5	335781	0.582	2035.38	1687.93	151.64	0.0898378	chr3:55965769-55983724	335781	NM_001080093	chr3	55965769	55983724	+
		FAR340	0.214	171.69	203.57	18.96	0.0931375	chr1:57151717-57151931			chr1	57151717	57151931	/
hbae1	hemoglobin alpha embryonic-1	30597	0.536	3896.2	3076.33	350.87	0.114055	chr3:55972040-55972738	30597	NM_182940	chr3	55972040	55972738	-	GO:0006810 // GO:0015671	transport // oxygen transport	GO:0005833	hemoglobin complex	GO:0005344 // GO:0005506 // GO:0019825 // GO:0020037 // GO:0046872	oxygen transporter activity // iron ion binding // oxygen binding // heme binding // metal ion binding
MGC173646	similar to embryonic 1 beta-globin	793447	0.583	1014.8	747.4	86.91	0.116283	chr3:55974334-55975111	793447	NM_001103130	chr3	55974334	55975111	+
slc4a1a	solute carrier family 4, anion exchanger, member 1a	84703	3.454	61.51	43.88	5.63	0.128304	chr3:19955146-19981240	84703	NM_198338	chr3	19955146	19981240	-	GO:0006810 // GO:0006820 // GO:0006820 // GO:0030218 // GO:0035162	transport // anion transport // anion transport // erythrocyte differentiation // embryonic hemopoiesis	GO:0016020 // GO:0016021	membrane // integral to membrane	GO:0005215 // GO:0005452 // GO:0005515 // GO:0008509	transporter activity // inorganic anion exchanger activity // protein binding // anion transmembrane transporter activity
cahz	carbonic anhydrase	30331	2.801	72.62	73.73	11.08	0.150278	chr2:29192216-29199937	30331	NM_131110	chr2	29192216	29199937	-	GO:0006730 // GO:0015670 // GO:0015670 // GO:0042539	one-carbon metabolic process // carbon dioxide transport // carbon dioxide transport // hypotonic salinity response			GO:0004089 // GO:0004089 // GO:0004089 // GO:0008270 // GO:0016829 // GO:0046872	carbonate dehydratase activity // carbonate dehydratase activity // carbonate dehydratase activity // zinc ion binding // lyase activity // metal ion binding
		FAR7776	3.99	7.35	32.61	5.68	0.17418	chr6:46784135-46803249			chr6	46784135	46803249	/
caspb	caspase b	259303	1.796	138.18	119.16	22.5	0.188822	chr1:58737281-58751091	259303	NM_152884	chr1	58737281	58751091	-	GO:0006508 // GO:0006915 // GO:0043065	proteolysis // apoptosis // positive regulation of apoptosis			GO:0004197 // GO:0008233 // GO:0008234 // GO:0016787	cysteine-type endopeptidase activity // peptidase activity // cysteine-type peptidase activity // hydrolase activity
lgals1l1	lectin, galactoside-binding, soluble, 1 (galectin 1)-like 1	326706	2.226	225.85	371.99	70.74	0.190166	chr3:29090878-29097869	326706	NM_001005958	chr3	29090878	29097869	+	GO:0008150	biological_process	GO:0005575	cellular_component	GO:0005529 // GO:0016936	sugar binding // galactoside binding
ca2	carbonic anhydrase II	387526	5.188	125.61	143.03	30.03	0.209956	chr24:33852209-33870072	387526	NM_199215	chr24	33852209	33870072	-	GO:0006730 // GO:0006814 // GO:0006885 // GO:0015670 // GO:0015670 // GO:0042221 // GO:0042539	one-carbon metabolic process // sodium ion transport // regulation of pH // carbon dioxide transport // carbon dioxide transport // response to chemical stimulus // hypotonic salinity response			GO:0004089 // GO:0004089 // GO:0004089 // GO:0008270 // GO:0046872	carbonate dehydratase activity // carbonate dehydratase activity // carbonate dehydratase activity // zinc ion binding // metal ion binding
igfbp2a	insulin-like growth factor binding protein 2a	794176	1.735	33.77	28.78	6.35	0.220639	chr6:22605878-22636510	794176	NM_131458	chr6	22605878	22636510	-	GO:0001525 // GO:0001558 // GO:0007275 // GO:0007507 // GO:0008156 // GO:0008285 // GO:0008285 // GO:0040007 // GO:0040008 // GO:0040015 // GO:0043567 // GO:0048640	angiogenesis // regulation of cell growth // multicellular organismal development // heart development // negative regulation of DNA replication // negative regulation of cell proliferation // negative regulation of cell proliferation // growth // regulation of growth // negative regulation of multicellular organism growth // regulation of insulin-like growth factor receptor signaling pathway // …	GO:0005576 // GO:0005576	extracellular region // extracellular region	GO:0005520 // GO:0005520 // GO:0019838 // GO:0031994 // GO:0031995	insulin-like growth factor binding // insulin-like growth factor binding // growth factor binding // insulin-like growth factor I binding // insulin-like growth factor II binding
ankrd1b	ankyrin repeat domain 1b (cardiac muscle)	564159	1.667	187.68	250.21	57.91	0.231446	chr12:17512224-17517853	564159	NM_001102388	chr12	17512224	17517853	+	GO:0008150	biological_process	GO:0005575	cellular_component	GO:0003674	molecular_function
vsg1	vessel-specific 1	570276	2.576	19.76	23.44	5.52	0.235495	chr11:6078305-6082990	570276	NM_001030244	chr11	6078305	6082990	-	GO:0007219	Notch signaling pathway	GO:0005575	cellular_component	GO:0003674	molecular_function
acta1b	actin, alpha 1b, skeletal muscle	407658	4.808	1604.98	2548.1	620.89	0.243668	chr13:24502951-24508327	407658	NM_214784	chr13	24502951	24508327	+	GO:0035050	embryonic heart tube development	GO:0005737 // GO:0005856	cytoplasm // cytoskeleton	GO:0000166 // GO:0005524	nucleotide binding // ATP binding
zgc:63663	zgc:63663	393586	4.199	19.19	44.32	11.02	0.248646	chr15:36534327-36549372	393586	NM_200614	chr15	36534327	36549372	-			GO:0005575	cellular_component	GO:0000166 // GO:0005524	nucleotide binding // ATP binding
zgc:92763	zgc:92763	436833	1.14	10.5	16.55	4.23	0.255589	chr16:34323678-34328383	436833	NM_001002560	chr16	34323678	34328383	-					GO:0015035	protein disulfide oxidoreductase activity
hbbe3	hemoglobin beta embryonic-3	30596	0.469	335.86	104.15	26.86	0.257897	chr12:21691962-21693036	30596	NM_001015058	chr12	21691962	21693036	-	GO:0006810 // GO:0015671	transport // oxygen transport	GO:0005833	hemoglobin complex	GO:0005344 // GO:0005506 // GO:0019825 // GO:0020037 // GO:0046872	oxygen transporter activity // iron ion binding // oxygen binding // heme binding // metal ion binding
nmnat1	nicotinamide nucleotide adenylyltransferase 1	550322	1.353	28.94	19.5	5.06	0.259487	chr23:29797483-29812719	550322	NM_001017629	chr23	29797483	29812719	-	GO:0009058 // GO:0009435	biosynthetic process // NAD biosynthetic process	GO:0005575	cellular_component	GO:0005488 // GO:0016779	binding // nucleotidyltransferase activity
hadha	hydroxyacyl-Coenzyme A dehydrogenase/3-ketoacyl-Coenzyme A thiolase/enoyl-Coenzyme A hydratase, alpha subunit	553401	3.35	22.15	27.02	7.06	0.261288	chr20:48621738-48655083	553401	NM_001105276	chr20	48621738	48655083	+	GO:0006631 // GO:0006635 // GO:0008152 // GO:0009617 // GO:0055114	fatty acid metabolic process // fatty acid beta-oxidation // metabolic process // response to bacterium // oxidation-reduction process	GO:0005739 // GO:0016507	mitochondrion // fatty acid beta-oxidation multienzyme complex	GO:0000166 // GO:0003824 // GO:0003857 // GO:0004300 // GO:0016491 // GO:0016616 // GO:0050662	nucleotide binding // catalytic activity // 3-hydroxyacyl-CoA dehydrogenase activity // enoyl-CoA hydratase activity // oxidoreductase activity // oxidoreductase activity, acting on the CH-OH group of donors, NAD or NADP as acceptor // coenzyme binding
adss	adenylosuccinate synthase	550502	2.123	19.9	29.23	8.01	0.274034	chr13:11205451-11252385	550502	NM_001017804	chr13	11205451	11252385	-	GO:0006164	purine nucleotide biosynthetic process	GO:0005737	cytoplasm	GO:0000166 // GO:0000287 // GO:0004019 // GO:0005525 // GO:0016874 // GO:0046872	nucleotide binding // magnesium ion binding // adenylosuccinate synthase activity // GTP binding // ligase activity // metal ion binding
zgc:92631	zgc:92631	436968	1.562	29.26	29.62	8.52	0.287643	chr24:41179010-41183537	436968	NM_001002695	chr24	41179010	41183537	-			GO:0005739	mitochondrion	GO:0004129	cytochrome-c oxidase activity
zgc:113054	zgc:113054	541322	3.889	19.56	17.46	5.11	0.292669	chr6:43381605-43406057	541322	NM_001013450	chr6	43381605	43406057	+	GO:0008152 // GO:0055114	metabolic process // oxidation-reduction process	GO:0005575	cellular_component	GO:0000166 // GO:0008171 // GO:0016491	nucleotide binding // O-methyltransferase activity // oxidoreductase activity
itgb1bp3	integrin beta 1 binding protein 3	447879	4.981	40.79	51.32	15.06	0.293453	chr2:56196037-56203406	447879	NM_001004618	chr2	56196037	56203406	+	GO:0007229	integrin-mediated signaling pathway	GO:0005575	cellular_component	GO:0003674	molecular_function
bcl2l13	BCL2-like 13 (apoptosis facilitator)	559355	5.758	14.35	16.65	5.05	0.303303	chr18:20364639-20388736	559355	NM_001044891	chr18	20364639	20388736	-	GO:0042981	regulation of apoptosis
aqp8a.1	aquaporin 8a, tandem duplicate 1	447923	1.304	35.61	37.66	11.43	0.303505	chr12:21718603-21725551	447923	NM_001004661	chr12	21718603	21725551	-	GO:0006810 // GO:0006833 // GO:0055085 // GO:0071918	transport // water transport // transmembrane transport // urea transmembrane transport	GO:0016020 // GO:0016021	membrane // integral to membrane	GO:0005215 // GO:0005372 // GO:0015204	transporter activity // water transmembrane transporter activity // urea transmembrane transporter activity
calrl	calreticulin like	321315	2.391	36.1	35.5	10.8	0.304225	chr2:55840149-55853077	321315	NM_201465	chr2	55840149	55853077	+	GO:0006457	protein folding	GO:0005783	endoplasmic reticulum	GO:0005509 // GO:0051082	calcium ion binding // unfolded protein binding
zgc:92902	zgc:92902	436735	1.098	10.5	14.01	4.34	0.309779	chr17:6040393-6046442	436735	NM_001002462	chr17	6040393	6046442	+	GO:0006470 // GO:0016311	protein dephosphorylation // dephosphorylation			GO:0004725 // GO:0008138 // GO:0016787 // GO:0016791	protein tyrosine phosphatase activity // protein tyrosine/serine/threonine phosphatase activity // hydrolase activity // phosphatase activity
abcf2	ATP-binding cassette, sub-family F (GCN20), member 2	336770	2.865	32.88	24.03	7.45	0.310029	chr2:32223430-32231393	336770	NM_201315	chr2	32223430	32231393	-					GO:0000166 // GO:0005524 // GO:0016887 // GO:0017111	nucleotide binding // ATP binding // ATPase activity // nucleoside-triphosphatase activity
pdip5	protein disulfide isomerase-related protein (provisional)	322160	3.17	32.82	39.47	12.5	0.316696	chr20:31243499-31257030	322160	NM_197933	chr20	31243499	31257030	+	GO:0006662 // GO:0045454	glycerol ether metabolic process // cell redox homeostasis			GO:0009055 // GO:0015035 // GO:0016853	electron carrier activity // protein disulfide oxidoreductase activity // isomerase activity
phkg1b	phosphorylase kinase, gamma 1b (muscle)	554046	3.975	8.35	12.62	4.02	0.318542	chr21:25056151-25065823	554046	NM_001023574	chr21	25056151	25065823	-	GO:0005978 // GO:0006468 // GO:0016310	glycogen biosynthetic process // protein phosphorylation // phosphorylation	GO:0005964	phosphorylase kinase complex	GO:0000166 // GO:0004672 // GO:0004674 // GO:0004689 // GO:0005516 // GO:0005524 // GO:0016301 // GO:0016740 // GO:0016772	nucleotide binding // protein kinase activity // protein serine/threonine kinase activity // phosphorylase kinase activity // calmodulin binding // ATP binding // kinase activity // transferase activity // transferase activity, transferring phosphorus-containing groups
agr2	anterior gradient homolog 2 (Xenopus laevis)	335616	1.107	30.39	28.57	9.57	0.334967	chr19:31646945-31649476	335616	NM_001012481	chr19	31646945	31649476	-	GO:0008150	biological_process	GO:0005576 // GO:0005576	extracellular region // extracellular region	GO:0003674	molecular_function
dnajb11	DnaJ (Hsp40) homolog, subfamily B, member 11	386709	2.152	23.32	23.11	7.8	0.337516	chr9:33674336-33681940	386709	NM_198821	chr9	33674336	33681940	-	GO:0006457	protein folding			GO:0031072 // GO:0051082	heat shock protein binding // unfolded protein binding
zgc:136930	zgc:136930	563946	2.393	127.27	205.96	69.69	0.338367	chr2:32498013-32508762	563946	NM_001039819	chr2	32498013	32508762	+	GO:0008150	biological_process	GO:0005882	intermediate filament	GO:0005198	structural molecule activity
fbp2	fructose-1,6-bisphosphatase 2	445505	1.188	10.81	20.23	6.86	0.3391	chr5:46432655-46448200	445505	NM_001004008	chr5	46432655	46448200	-	GO:0005975 // GO:0016311	carbohydrate metabolic process // dephosphorylation			GO:0016787 // GO:0042578	hydrolase activity // phosphoric ester hydrolase activity
rhbg	Rhesus blood group, B glycoprotein	337596	4.64	20.57	31.71	10.86	0.342479	chr16:31494335-31505403	337596	NM_200071	chr16	31494335	31505403	-	GO:0006810 // GO:0015696 // GO:0015696	transport // ammonium transport // ammonium transport	GO:0005886 // GO:0016020 // GO:0016021 // GO:0016323 // GO:0030659 // GO:0031410	plasma membrane // membrane // integral to membrane // basolateral plasma membrane // cytoplasmic vesicle membrane // cytoplasmic vesicle
		FAR1426	22.546	8.83	13.04	4.48	0.343558	chr13:1401116-1472083			chr13	1401116	1472083	/
pgp	phosphoglycolate phosphatase	792824	1.694	9.07	12.56	4.36	0.347134	chr12:19591521-19594812	792824	NM_212726	chr12	19591521	19594812	-	GO:0008152	metabolic process	GO:0005575	cellular_component	GO:0003824 // GO:0016787 // GO:0016791	catalytic activity // hydrolase activity // phosphatase activity
acaa2	acetyl-CoA acyltransferase 2	406325	1.903	37.8	44.6	15.61	0.35	chr8:2684694-2704946	406325	NM_213052	chr8	2684694	2704946	-	GO:0008152	metabolic process			GO:0003824 // GO:0016740 // GO:0016746 // GO:0016747	catalytic activity // transferase activity // transferase activity, transferring acyl groups // transferase activity, transferring acyl groups other than amino-acyl groups
ndufa4	NADH dehydrogenase (ubiquinone) 1 alpha subcomplex, 4	406298	1.082	77.76	85.04	30.37	0.357126	chr12:10855549-10859061	406298	NM_213025	chr12	10855549	10859061	+	GO:0006810 // GO:0022900	transport // electron transport chain	GO:0005739 // GO:0005743 // GO:0016020 // GO:0070469	mitochondrion // mitochondrial inner membrane // membrane // respiratory chain
hadhb	hydroxyacyl-Coenzyme A dehydrogenase/3-ketoacyl-Coenzyme A thiolase/enoyl-Coenzyme A hydratase (trifunctional protein), beta subunit	336606	1.94	39.22	47.77	17.12	0.358384	Zv9_NA706:901-21663	336606	NM_200019	Zv9_NA706	901	21663	+	GO:0008152	metabolic process			GO:0003824 // GO:0016740 // GO:0016746 // GO:0016747	catalytic activity // transferase activity // transferase activity, transferring acyl groups // transferase activity, transferring acyl groups other than amino-acyl groups
kera	keratocan	567017	2.842	71.36	61.23	22.02	0.359628	chr4:15406832-15413243	567017	NM_001025548	chr4	15406832	15413243	-
ucp2	uncoupling protein 2	555812	2.155	95.71	75.95	27.32	0.35971	chr10:37906776-37917458	555812	NM_131176	chr10	37906776	37917458	+	GO:0006810 // GO:0006839	transport // mitochondrial transport	GO:0005739 // GO:0005743 // GO:0016020 // GO:0016021	mitochondrion // mitochondrial inner membrane // membrane // integral to membrane	GO:0005488	binding
tgm2	transglutaminase 2, C polypeptide	447909	4.992	13.52	21.88	7.96	0.363803	chr23:43623090-43639783	447909	NM_001004647	chr23	43623090	43639783	+	GO:0018149	peptide cross-linking	GO:0005575	cellular_component	GO:0003810 // GO:0046872	protein-glutamine gamma-glutamyltransferase activity // metal ion binding
zgc:158138	zgc:158138	793834	3.2	34.12	41.42	15.11	0.3648	chr17:37395479-37420328	793834	NM_001089437	chr17	37395479	37420328	+	GO:0006631 // GO:0006635 // GO:0008152 // GO:0055114	fatty acid metabolic process // fatty acid beta-oxidation // metabolic process // oxidation-reduction process	GO:0005739 // GO:0016507	mitochondrion // fatty acid beta-oxidation multienzyme complex	GO:0000166 // GO:0003824 // GO:0003857 // GO:0004300 // GO:0016491 // GO:0016616 // GO:0050662	nucleotide binding // catalytic activity // 3-hydroxyacyl-CoA dehydrogenase activity // enoyl-CoA hydratase activity // oxidoreductase activity // oxidoreductase activity, acting on the CH-OH group of donors, NAD or NADP as acceptor // coenzyme binding
ldha	lactate dehydrogenase A4	30496	3.162	64.2	109.35	40.1	0.366712	chr25:25749747-25758117	30496	NM_131246	chr25	25749747	25758117	-	GO:0001666 // GO:0005975 // GO:0006096 // GO:0044262 // GO:0055114	response to hypoxia // carbohydrate metabolic process // glycolysis // cellular carbohydrate metabolic process // oxidation-reduction process	GO:0005737	cytoplasm	GO:0000166 // GO:0003824 // GO:0004459 // GO:0016491 // GO:0016616	nucleotide binding // catalytic activity // L-lactate dehydrogenase activity // oxidoreductase activity // oxidoreductase activity, acting on the CH-OH group of donors, NAD or NADP as acceptor
uchl3	ubiquitin carboxyl-terminal esterase L3 (ubiquitin thiolesterase)	554104	1.422	23.18	24.89	9.23	0.370832	chr9:23004807-23009980	554104	NM_001024405	chr9	23004807	23009980	-	GO:0006511 // GO:0007219	ubiquitin-dependent protein catabolic process // Notch signaling pathway	GO:0005622	intracellular	GO:0004221	ubiquitin thiolesterase activity
gygl	glycogenin, like	415152	1.454	5.8	14.72	5.47	0.371603	chr24:3385577-3403816	415152	NM_001002062	chr24	3385577	3403816	+			GO:0005575	cellular_component	GO:0016757	transferase activity, transferring glycosyl groups
sdf2l1	stromal cell-derived factor 2-like 1	445275	1.436	11.49	13.49	5.05	0.374351	chr5:14510877-14517995	445275	NM_001003730	chr5	14510877	14517995	-	GO:0008150	biological_process	GO:0016020	membrane	GO:0003674	molecular_function
cndp2	CNDP dipeptidase 2 (metallopeptidase M20 family)	327288	2.024	20.14	22.37	8.5	0.379973	chr19:21283805-21305398	327288	NM_214704	chr19	21283805	21305398	+	GO:0006508 // GO:0008152	proteolysis // metabolic process	GO:0005575	cellular_component	GO:0008237 // GO:0016787 // GO:0016805 // GO:0034701	metallopeptidase activity // hydrolase activity // dipeptidase activity // tripeptidase activity
fkbp11	FK506 binding protein 11	368823	0.804	22.74	13.48	5.13	0.380564	chr6:7346029-7355492	368823	NM_001012249	chr6	7346029	7355492	-	GO:0006457 // GO:0018208 // GO:0042221	protein folding // peptidyl-proline modification // response to chemical stimulus	GO:0016020	membrane	GO:0003755 // GO:0003755 // GO:0005528 // GO:0016853	peptidyl-prolyl cis-trans isomerase activity // peptidyl-prolyl cis-trans isomerase activity // FK506 binding // isomerase activity
gstm3	glutathione S-transferase M3 (brain)	568744	1.001	48.1	51.64	19.66	0.380713	chr8:26155115-26159952	568744	NM_001162851	chr8	26155115	26159952	+	GO:0008152	metabolic process	GO:0005575	cellular_component	GO:0004364 // GO:0016740	glutathione transferase activity // transferase activity
slc25a4	solute carrier family 25 (mitochondrial carrier; adenine nucleotide translocator), member 4	327067	2.482	185.89	359.69	136.99	0.380856	chr1:16418657-16420982	327067	NM_214702	chr1	16418657	16420982	+	GO:0006810 // GO:0055085	transport // transmembrane transport	GO:0005743 // GO:0016020 // GO:0016021	mitochondrial inner membrane // membrane // integral to membrane	GO:0005215 // GO:0005488	transporter activity // binding
gb:cn833218	expressed sequence CN833218	100190888	3.008	10.12	13.16	5.02	0.381459	chr25:19441762-19443381	100190888	NM_001135573	chr25	19441762	19443381	-
tomm40l	translocase of outer mitochondrial membrane 40 homolog, like	405895	2.28	13.73	16.26	6.22	0.382534	chr19:11453433-11463779	405895	NM_212959	chr19	11453433	11463779	+	GO:0006820 // GO:0044070 // GO:0055085	anion transport // regulation of anion transport // transmembrane transport	GO:0005741	mitochondrial outer membrane	GO:0008308	voltage-gated anion channel activity
col17a1a	collagen, type XVII, alpha 1a	557257	5.724	76.53	76.78	29.65	0.386168	chr1:50074734-50112253	557257	NM_001145565	chr1	50074734	50112253	+	GO:0008544	epidermis development	GO:0005581	collagen
hsp90b1	heat shock protein 90, beta (grp94), member 1	386590	5.74	75.71	77.76	30.13	0.387474	chr4:8898745-8906072	386590	NM_198210	chr4	8898745	8906072	+	GO:0006457 // GO:0006950 // GO:0035889	protein folding // response to stress // otolith tethering			GO:0005524 // GO:0051082	ATP binding // unfolded protein binding
gfm1	G elongation factor, mitochondrial 1	561840	3.257	10.15	13.2	5.18	0.392424	chr15:1163682-1191313	561840	NM_001079994	chr15	1163682	1191313	+	GO:0006184 // GO:0006412 // GO:0006414 // GO:0070125	GTP catabolic process // translation // translational elongation // mitochondrial translational elongation	GO:0005622 // GO:0005739	intracellular // mitochondrion	GO:0000166 // GO:0003746 // GO:0003746 // GO:0003924 // GO:0003924 // GO:0005525	nucleotide binding // translation elongation factor activity // translation elongation factor activity // GTPase activity // GTPase activity // GTP binding
adsl	adenylosuccinate lyase	334431	1.781	36.66	45.8	17.98	0.392576	chr3:24498589-24509860	334431	NM_199899	chr3	24498589	24509860	+	GO:0009152	purine ribonucleotide biosynthetic process	GO:0005737	cytoplasm	GO:0003824 // GO:0004018 // GO:0016829	catalytic activity // N6-(1,2-dicarboxyethyl)AMP AMP-lyase (fumarate-forming) activity // lyase activity
		FAR613	5.437	17.62	12.62	4.98	0.394612	chr10:34641101-34650370			chr10	34641101	34650370	/
samm50	sorting and assembly machinery component 50 homolog (S. cerevisiae)	393111	2.804	20.59	26.92	10.63	0.394874	chr25:19498569-19511895	393111	NM_200142	chr25	19498569	19511895	+			GO:0005739 // GO:0005741 // GO:0016020 // GO:0016021 // GO:0019867	mitochondrion // mitochondrial outer membrane // membrane // integral to membrane // outer membrane	GO:0003674	molecular_function
zgc:101581	zgc:101581	493617	1.542	15.71	16.93	6.73	0.397519	chr13:12540691-12551136	493617	NM_001007777	chr13	12540691	12551136	+	GO:0006412 // GO:0006413	translation // translational initiation	GO:0005737	cytoplasm	GO:0003723 // GO:0003743	RNA binding // translation initiation factor activity
fkbp7	FK506 binding protein 7	368498	11.279	83.04	50	19.98	0.3996	chr9:43801310-43803658	368498	NM_001004506	chr9	43801310	43803658	-	GO:0006457 // GO:0018208	protein folding // peptidyl-proline modification	GO:0005783 // GO:0016020	endoplasmic reticulum // membrane	GO:0003755 // GO:0005509 // GO:0005528	peptidyl-prolyl cis-trans isomerase activity // calcium ion binding // FK506 binding
rcn3	reticulocalbin 3, EF-hand calcium binding domain	415248	1.781	158.6	94.58	37.92	0.40093	chr3:32673895-32677998	415248	NM_001002158	chr3	32673895	32677998	-					GO:0005509	calcium ion binding
tomm34	translocase of outer mitochondrial membrane 34	323361	3.434	9.68	12.17	4.88	0.400986	chr6:52177501-52185731	323361	NM_199638	chr6	52177501	52185731	-					GO:0005488	binding
ptgesl	prostaglandin E synthase 2-like	799964	2.551	13.04	16.24	6.54	0.402709	chr8:31856329-31861706	799964	NM_200280	chr8	31856329	31861706	+	GO:0001516 // GO:0006633 // GO:0008610 // GO:0045454	prostaglandin biosynthetic process // fatty acid biosynthetic process // lipid biosynthetic process // cell redox homeostasis	GO:0016020 // GO:0016021	membrane // integral to membrane	GO:0009055 // GO:0015035 // GO:0016853 // GO:0050220	electron carrier activity // protein disulfide oxidoreductase activity // isomerase activity // prostaglandin-E synthase activity
odc1	ornithine decarboxylase 1	114426	2.124	30	19.19	7.77	0.404898	chr17:52270231-52283858	114426	NM_131801	chr17	52270231	52283858	+	GO:0006596 // GO:0042462	polyamine biosynthetic process // eye photoreceptor cell development			GO:0003824	catalytic activity
sult2st1	sulfotransferase family 2, cytosolic sulfotransferase 1	338214	2.327	36.01	29.45	11.94	0.405433	chr12:790452-842907	338214	NM_198914	chr12	790452	842907	-	GO:0008152	metabolic process			GO:0008146 // GO:0008146 // GO:0016740 // GO:0016783	sulfotransferase activity // sulfotransferase activity // transferase activity // sulfurtransferase activity
acadm	acyl-Coenzyme A dehydrogenase, C-4 to C-12 straight chain	406283	1.992	39.2	49.68	20.24	0.407407	chr2:26618241-26624291	406283	NM_213089, NM_213010	chr2	26618241	26624291	-	GO:0008152 // GO:0008152 // GO:0055114 // GO:0055114	metabolic process // metabolic process // oxidation-reduction process // oxidation-reduction process			GO:0003995 // GO:0003995 // GO:0016491 // GO:0016491 // GO:0016627 // GO:0016627 // GO:0050660 // GO:0050660	acyl-CoA dehydrogenase activity // acyl-CoA dehydrogenase activity // oxidoreductase activity // oxidoreductase activity // oxidoreductase activity, acting on the CH-CH group of donors // oxidoreductase activity, acting on the CH-CH group of donors // flavin adenine dinucleotide binding // flavin adenine dinucleotide binding
rtn2a	reticulon 2a	569502	1.639	20	38.86	15.86	0.408132	chr15:9146209-9167312	569502	NM_001029965	chr15	9146209	9167312	-	GO:0008150	biological_process	GO:0005783	endoplasmic reticulum	GO:0003674	molecular_function
hadh	hydroxyacyl-Coenzyme A dehydrogenase	445121	3.354	50	57.55	23.59	0.409904	chr1:50416755-50425950	445121	NM_001003515	chr1	50416755	50425950	-	GO:0006631 // GO:0055114	fatty acid metabolic process // oxidation-reduction process			GO:0000166 // GO:0003857 // GO:0016491 // GO:0016616 // GO:0050662 // GO:0070403	nucleotide binding // 3-hydroxyacyl-CoA dehydrogenase activity // oxidoreductase activity // oxidoreductase activity, acting on the CH-OH group of donors, NAD or NADP as acceptor // coenzyme binding // NAD+ binding
myhz1.1	myosin, heavy polypeptide 1.1, skeletal muscle	58142	7.101	319.21	524.67	215.68	0.411077	chr5:33936239-33946746	58142	NM_001130666, NM_001115089	chr5	33936239	33946746	-	GO:0001757 // GO:0001757	somite specification // somite specification	GO:0016459 // GO:0016459 // GO:0032982 // GO:0032982	myosin complex // myosin complex // myosin filament // myosin filament	GO:0000166 // GO:0000166 // GO:0003774 // GO:0003774 // GO:0003779 // GO:0003779 // GO:0005524 // GO:0005524	nucleotide binding // nucleotide binding // motor activity // motor activity // actin binding // actin binding // ATP binding // ATP binding
tyms	thymidylate synthase	81540	1.822	17.96	12.51	5.15	0.411671	chr7:75223009-75229204	81540	NM_131760	chr7	75223009	75229204	+	GO:0006231 // GO:0006231 // GO:0009165 // GO:0032259 // GO:0032259 // GO:0060041	dTMP biosynthetic process // dTMP biosynthetic process // nucleotide biosynthetic process // methylation // methylation // retina development in camera-type eye			GO:0004799 // GO:0004799 // GO:0008168 // GO:0016740 // GO:0042083	thymidylate synthase activity // thymidylate synthase activity // methyltransferase activity // transferase activity // 5,10-methylenetetrahydrofolate-dependent methyltransferase activity
adkb	adenosine kinase b	322229	2.094	31.08	34.66	14.31	0.412868	chr12:47919624-47945568	322229	NM_198802	chr12	47919624	47945568	+	GO:0006166 // GO:0016310	purine ribonucleoside salvage // phosphorylation			GO:0004001 // GO:0016301 // GO:0016773	adenosine kinase activity // kinase activity // phosphotransferase activity, alcohol group as acceptor
pdia4	protein disulfide isomerase associated 4	554998	2.813	31.7	32.44	13.5	0.416153	chr24:17883870-17890562	554998	NM_199779	chr24	17883870	17890562	+	GO:0006662 // GO:0045454	glycerol ether metabolic process // cell redox homeostasis	GO:0005783 // GO:0005788	endoplasmic reticulum // endoplasmic reticulum lumen	GO:0003756 // GO:0009055 // GO:0015035 // GO:0016853	protein disulfide isomerase activity // electron carrier activity // protein disulfide oxidoreductase activity // isomerase activity
slc25a20	solute carrier family 25 (carnitine/acylcarnitine translocase), member 20	393833	1.599	17.77	19.36	8.06	0.416322	chr22:203830-208140	393833	NM_200859	chr22	203830	208140	-	GO:0006810	transport	GO:0016020 // GO:0016021	membrane // integral to membrane
sae1	SUMO1 activating enzyme subunit 1	415148	4.712	23.29	16.38	6.82	0.416361	chr15:23076175-23092649	415148	NM_001002058	chr15	23076175	23092649	+	GO:0006464 // GO:0016925	protein modification process // protein sumoylation	GO:0005634	nucleus	GO:0000166 // GO:0003824 // GO:0008022 // GO:0008641 // GO:0016874 // GO:0019948	nucleotide binding // catalytic activity // protein C-terminus binding // small protein activating enzyme activity // ligase activity // SUMO activating enzyme activity
zgc:110680	zgc:110680	324900	2.407	26	27.22	11.35	0.416973	chr2:9361511-9370252	324900	NM_001020824	chr2	9361511	9370252	+	GO:0045454	cell redox homeostasis
srm	spermidine synthase	394009	3.756	17.94	18.99	7.94	0.418115	chr23:28961751-28969998	394009	NM_201034	chr23	28961751	28969998	+			GO:0005575	cellular_component	GO:0003824 // GO:0016740	catalytic activity // transferase activity
apex1	APEX nuclease (multifunctional DNA repair enzyme) 1	406730	2.499	28.3	25.39	10.67	0.420244	chr4:5207250-5213078	406730	NM_213421	chr4	5207250	5213078	+	GO:0001947 // GO:0006281 // GO:0006974 // GO:0043066 // GO:0060047 // GO:0080111	heart looping // DNA repair // response to DNA damage stimulus // negative regulation of apoptosis // heart contraction // DNA demethylation	GO:0005622 // GO:0005634 // GO:0005730 // GO:0005737 // GO:0005739 // GO:0005783 // GO:0016607	intracellular // nucleus // nucleolus // cytoplasm // mitochondrion // endoplasmic reticulum // nuclear speck	GO:0003677 // GO:0003723 // GO:0003906 // GO:0004518 // GO:0004519 // GO:0016491 // GO:0016787 // GO:0016829 // GO:0046872	DNA binding // RNA binding // DNA-(apurinic or apyrimidinic site) lyase activity // nuclease activity // endonuclease activity // oxidoreductase activity // hydrolase activity // lyase activity // metal ion binding
psmd11b	proteasome (prosome, macropain) 216S subunit, non-ATPase, 11b	322265	4.52	19.52	22.77	9.59	0.421168	chr12:29898005-29911253	322265	NM_199592	chr12	29898005	29911253	-			GO:0000502	proteasome complex
eif4e1c	eukaryotic translation initiation factor 4E family member 1c	550549	1.753	29.94	24.94	10.51	0.421411	chr13:18360444-18373441	550549	NM_001017851	chr13	18360444	18373441	+	GO:0006412 // GO:0006413	translation // translational initiation	GO:0005737	cytoplasm	GO:0003723 // GO:0003743	RNA binding // translation initiation factor activity
ptges3b	prostaglandin E synthase 3b (cytosolic)	415227	0.991	65.01	61.41	26.05	0.424198	chr23:6847607-6861311	415227	NM_001002137	chr23	6847607	6861311	-	GO:0008150	biological_process	GO:0005575	cellular_component	GO:0003674	molecular_function
zgc:92139	zgc:92139	436628	2.767	17.53	18.22	7.76	0.425906	chr11:7323094-7352092	436628	NM_001002355	chr11	7323094	7352092	-	GO:0006508	proteolysis	GO:0005575	cellular_component	GO:0004222 // GO:0008233 // GO:0008237 // GO:0016787 // GO:0046872	metalloendopeptidase activity // peptidase activity // metallopeptidase activity // hydrolase activity // metal ion binding
si:dkey-58f10.1	si:dkey-58f10.1	553284	2.374	11.11	13.01	5.55	0.426595	chr5:40425674-40435021	553284	NM_001204133	chr5	40425674	40435021	+	GO:0006412	translation	GO:0005622 // GO:0005840 // GO:0015934	intracellular // ribosome // large ribosomal subunit	GO:0003723 // GO:0003735	RNA binding // structural constituent of ribosome
calr	calreticulin	30248	3.282	83.07	84.5	36.22	0.428639	chr22:4339291-4345519	30248	NM_131047	chr22	4339291	4345519	-	GO:0006457	protein folding	GO:0005783	endoplasmic reticulum	GO:0005509 // GO:0051082	calcium ion binding // unfolded protein binding
urod	uroporphyrinogen decarboxylase	30617	1.414	12.27	10.09	4.34	0.430129	chr2:27704112-27723869	30617	NM_131347	chr2	27704112	27723869	-	GO:0006778 // GO:0006779 // GO:0006783	porphyrin-containing compound metabolic process // porphyrin-containing compound biosynthetic process // heme biosynthetic process	GO:0005737	cytoplasm	GO:0004853 // GO:0004853 // GO:0016829 // GO:0016831	uroporphyrinogen decarboxylase activity // uroporphyrinogen decarboxylase activity // lyase activity // carboxy-lyase activity
decr1	2,4-dienoyl CoA reductase 1, mitochondrial	436717	4.254	9.85	11.45	4.95	0.432314	chr16:38154194-38165789	436717	NM_001002444	chr16	38154194	38165789	+	GO:0008152	metabolic process			GO:0000166 // GO:0016491	nucleotide binding // oxidoreductase activity
myhz1.2	myosin, heavy polypeptide 1.2, skeletal muscle	799300	7.307	119.95	194	83.94	0.43268	chr5:33919430-33930580	799300	NM_001161446	chr5	33919430	33930580	-			GO:0016459 // GO:0032982	myosin complex // myosin filament	GO:0000166 // GO:0003774 // GO:0003779 // GO:0005524	nucleotide binding // motor activity // actin binding // ATP binding
zgc:173594	zgc:173594	100126128	1.447	4.32	17.65	7.64	0.432861	chr3:32276514-32278059	100126128	NM_001109854	chr3	32276514	32278059	+	GO:0006826 // GO:0006879 // GO:0055114	iron ion transport // cellular iron ion homeostasis // oxidation-reduction process	GO:0005575	cellular_component	GO:0005488 // GO:0008199 // GO:0016491 // GO:0046872 // GO:0046914	binding // ferric iron binding // oxidoreductase activity // metal ion binding // transition metal ion binding
hspa4a	heat shock protein 4a	335865	3.222	16.17	21.22	9.21	0.434025	chr21:41543116-41577027	335865	NM_214716	chr21	41543116	41577027	-	GO:0006950	response to stress			GO:0000166 // GO:0005524	nucleotide binding // ATP binding
		FAR7161	2.784	208.2	334.09	145.58	0.435751	chr5:33904290-33909386			chr5	33904290	33909386	/
mcm6	MCM6 minichromosome maintenance deficient 6, mitotin (S. cerevisiae)	566409	3.173	26.11	19.59	8.55	0.436447	chr6:12880066-12897310	566409	NM_001082849	chr6	12880066	12897310	+	GO:0006200 // GO:0006260 // GO:0006270	ATP catabolic process // DNA replication // DNA-dependent DNA replication initiation	GO:0005634	nucleus	GO:0000166 // GO:0003677 // GO:0005524	nucleotide binding // DNA binding // ATP binding
wfdc1	WAP four-disulfide core domain 1	560860	2.301	19.01	21.1	9.22	0.436967	chr18:14181616-14203777	560860	NM_001100000	chr18	14181616	14203777	+			GO:0005576	extracellular region	GO:0030414	peptidase inhibitor activity
fen1	flap structure-specific endonuclease 1	386707	2.455	23.82	16.31	7.14	0.437768	chr24:11681084-11691832	386707	NM_198820	chr24	11681084	11691832	+	GO:0006260 // GO:0006281 // GO:0006974 // GO:0060041	DNA replication // DNA repair // response to DNA damage stimulus // retina development in camera-type eye	GO:0005634 // GO:0005654 // GO:0005730 // GO:0005739	nucleus // nucleoplasm // nucleolus // mitochondrion	GO:0003677 // GO:0003824 // GO:0004518 // GO:0004519 // GO:0004527 // GO:0016787 // GO:0016788 // GO:0046872	DNA binding // catalytic activity // nuclease activity // endonuclease activity // exonuclease activity // hydrolase activity // hydrolase activity, acting on ester bonds // metal ion binding
